# 1 **Genomic Landscape and Molecular Subtypes of Primary Central Nervous System** 2 **Lymphoma**

3 Shengjie Li<sup>1,2,3,4,5,6\*#</sup>, Danhui Li<sup>7#</sup>, Zuguang Xia<sup>8,9#</sup>, Jianing Wu<sup>6</sup>, Jun Ren<sup>6</sup>, Yingzhu Li<sup>6</sup>,  
4 Jiazhen Cao<sup>8,10</sup>, Ying Sun<sup>11</sup>, Liyang Zhang<sup>12</sup>, Hongwei Ye<sup>12</sup>, Xingtao Zhou<sup>5\*</sup>, Chengxun Li<sup>13\*</sup>,  
5 Wenjun Cao<sup>6\*</sup>, Ying Mao<sup>1,2,3,4\*</sup>

6 1. Department of Neurosurgery, Huashan Hospital, Department of Clinical Laboratory, Eye &  
7 ENT Hospital, Shanghai Medical College, Fudan University, Shanghai, China

8 2. National Center for Neurological Disorders, Shanghai, China

9 3. Shanghai Key Laboratory of Brain Function Restoration and Neural Regeneration,  
10 Shanghai, China

11 4. Neurosurgical Institute of Fudan University, Shanghai, China

12 5. Eye Institute and Department of Ophthalmology, Eye & ENT Hospital, Fudan University,  
13 Shanghai, China

14 6. Department of Clinical Laboratory, Eye & ENT Hospital, Shanghai Medical College, Fudan  
15 University, Shanghai, China

16 7. Department of Pathology, RenJi Hospital, School of Medicine, Shanghai JiaoTong  
17 University, Shanghai, 200127, China

18 8. Department of Medical Oncology, Fudan University Shanghai Cancer Center, Fudan  
19 University, Shanghai, China

20 9. Department of Oncology, Shanghai Medical College, Fudan University, Shanghai, China

21 10. Department of Clinical Laboratory, Fudan University Shanghai Cancer Center, Fudan  
22 University, Shanghai, China

23 11. GenomiCare Biotechnology (Shanghai) Co. Ltd., Shanghai, China

24 12. Guangzhou KingMed Center for Clinical Laboratory Co. Ltd., Guangzhou, China

25 13. Institutes of Biomedical Sciences, Fudan University, Shanghai, 200032, China

26

27 **#Shengjie Li, Danhui Li, and Zuguang Xia contributed equally to this work.**

28

**NOTE: This preprint reports new research that has not been certified by peer review and should not be used to guide clinical practice.**

29 **Corresponding Authors:**

30 Wenjun Cao, Department of Clinical Laboratory, Eye & ENT Hospital, Fudan University, No.  
31 83 Fenyang Road, Shanghai, China; Electronic address: [wgkjyk@aliyun.com](mailto:wgkjyk@aliyun.com).

32 Chengxun Li, Institutes of Biomedical Sciences, Fudan University, Shanghai, 200032, China  
33 Electronic address: [licx21@m.fudan.edu.cn](mailto:licx21@m.fudan.edu.cn)

34 Xingtao, Zhou, Eye Institute and Department of Ophthalmology, Eye & ENT Hospital, Fudan  
35 University, Shanghai, 200031, China. Electronic address: [doctzhouxingtao@163.com](mailto:doctzhouxingtao@163.com).

36 Ying Mao, Department of Neurosurgery, Huashan Hospital, Fudan University, No. 12  
37 Wulumuqi Road, Shanghai, 200040, China; Electronic address: [maoying@fudan.edu.cn](mailto:maoying@fudan.edu.cn)

38

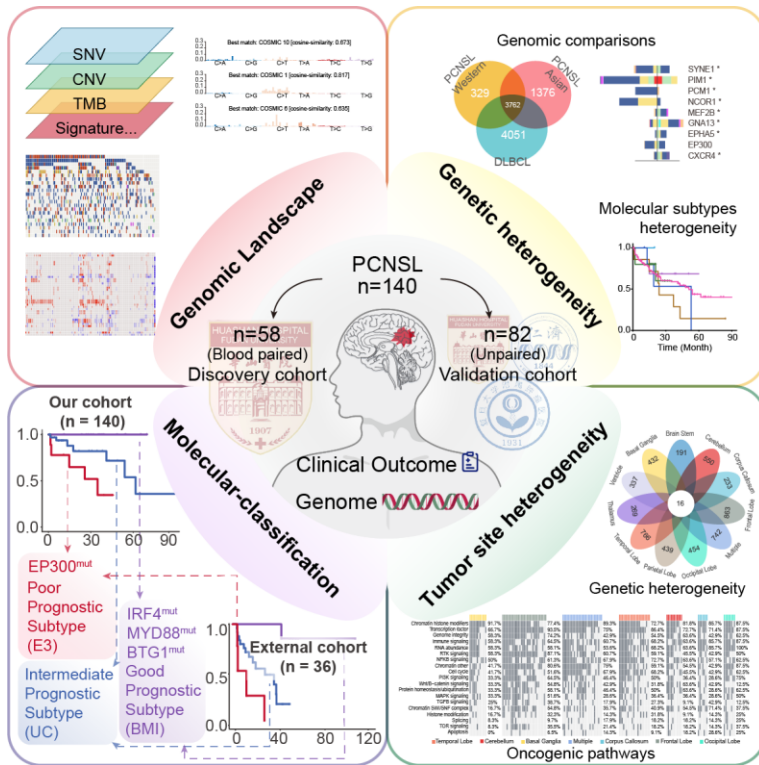

39

## 40 Highlights

- 41 1. In this study, the genomic landscape of 140 Chinese patients with primary central nervous
- 42 system lymphomas (PCNSLs) was evaluated.
- 43 2. Chinese PCNSL patients have a defining genetic signature that differs from that of both
- 44 PCNSL patients in other racial groups and DLBCL patients.
- 45 3. Three robust molecular subtypes of PCNSL related to clinical and molecular features were
- 46 identified and validated.
- 47 4. The rate of EP300 mutation in PCNSLs was approximately three times higher among
- 48 Asians than among Western patients, resulting in unfavorable outcomes independent of the
- 49 specific mutation site.

50

51 **Abstract**

52 Primary central nervous system lymphoma (PCNSL) is a rare and aggressive brain tumor  
53 with a poor prognosis and almost exclusively comprises diffuse large B-cell lymphoma  
54 (DLBCL). Its genetic characteristics and molecular subtypes in Chinese patients remain  
55 poorly understood, which in turn makes developing effective new therapies challenging. In  
56 our study, 140 Chinese patients with PCNSL that was newly diagnosed at one of three tertiary  
57 care centers and who underwent extensive follow-up were included. With this sample, we  
58 performed a genomic study aimed at expanding the genomic landscape and identifying new  
59 molecular subtypes. We first confirmed that the molecular subtype categories of DLBCL, as  
60 previously published, are not applicable to PCNSLs in Chinese patients. We then identified  
61 (n = 58) and validated (n = 82) three prominent genetic subtypes related to different clinical  
62 and molecular features of PCNSL and further confirmed them in an independent external  
63 Chinese PCNSL cohort (n = 36). We called these BMIs (from the co-occurrence of mutations  
64 in two genes among BTG1, MYD88, and IRF4), which are associated with favorable  
65 outcomes; E3s (so-called EP300 mutations), which are associated with unfavorable  
66 outcomes; and UCs (unclassified, without characteristic mutations). Importantly, EP300 was  
67 mutated in more PCNSLs from Asian patients (16.88%) than from Western patients (< 5.26%),  
68 resulting in unfavorable outcomes independent of the specific mutation site. Our analysis  
69 comprehensively reveals the genomic landscape of PCNSL in Chinese patients and  
70 emphasizes the clinical value of molecular classification for improving precision medicine  
71 strategies.

72

## 73 Introduction

74 Primary central nervous system lymphoma (PCNSL), a rare subtype of extranodal non-  
75 Hodgkin lymphoma, accounts for >60% of PCNSL cases and has an unfavorable prognosis  
76 even when the patient receives standard treatment, which is based on a high-dose  
77 methotrexate (HD-MTX) regimen<sup>1,2</sup>. PCNSL is a unique lymphoma that differs from other  
78 tumors and is characterized as a genetically heterogeneous disorder marked by a variety of  
79 low-frequency mutations, somatic copy number alterations, and structural variants<sup>3-6</sup>. Thus,  
80 combining standard immunochemotherapy with promising novel agents that target specific  
81 pathways via different molecular clusters may improve patient prognosis<sup>7,8</sup>.

82 Pathologically, nearly 95% of PCNSLs are diffuse large B-cell lymphomas (DLBCLs).  
83 Recently, DLBCL has been categorized into various molecular clusters on the basis of  
84 genomic sequencing and RNA sequencing, including quartet categorization by *L.M. Staudt's*  
85 team<sup>9</sup>, quintet categorization by *M.A. Shipp's* team<sup>10</sup>, *L.M. Staudt's* team's refined septet  
86 method<sup>11</sup>, and the LymphPlex classification proposed by *W.L. Zhao's* team<sup>12</sup>. However,  
87 PCNSL has been proven to be a biological entity that is molecularly distinct from DLBCL<sup>13</sup>,  
88 so these molecular clusters of DLBCL may not be applicable to PCNSL. Notably, the  
89 integration of genome-wide data from multiomic studies by *A. Alentorn et al.*<sup>14</sup> showed four  
90 molecular patterns of PCNSL using only gene expression data. These patterns have a  
91 distinctive prognostic impact, providing a basis for future clinical stratification and subtype-  
92 based targeted interventions. Owing to the molecular heterogeneity between various ethnic  
93 groups of PCNSL patients<sup>3,15</sup>, the applicability of the proposed classifications for PCNSL to  
94 other populations requires further confirmation. No effective biomarker or molecular  
95 classification scheme exists to tailor therapies for individual PCNSL patients. Furthermore,  
96 the issue of PCNSL molecular heterogeneity in Chinese patients has not been adequately  
97 addressed, primarily because the data have come from small, single-center studies of  
98 Chinese PCNSL patients<sup>16,17</sup>.

99 To address these issues, we conducted whole-exome sequencing (WES) on specimens  
100 obtained from 140 patients with newly diagnosed PCNSL who were seen at one of three  
101 tertiary care cancer centers. These patients were divided into a discovery cohort and a

102 validation cohort. Among the 140 patients, 94.29% received treatment with the HD-MTX-  
103 based chemotherapy regimen, and all 140 patients underwent long-term follow-up. This  
104 representative and clinically annotated PCNSL cohort was utilized to comprehensively detect  
105 mutations. Additionally, to facilitate routine clinical implementation, we identified three  
106 molecular subtypes composed only of single-nucleotide variations (SNVs); these SNVs were  
107 associated with different outcomes, and this was confirmed in the validation cohort and in an  
108 independent external Chinese PCNSL cohort<sup>17</sup>. Our results comprehensively reveal the  
109 genomic landscape of PCNSLs in Chinese patients and provide a clinically actionable PCNSL  
110 classification system, thereby improving precision medicine strategies.

111

## 112 **Results**

### 113 **PCNSL genomic landscape**

114 Using WES, we detected mutations in 140 patients who were newly diagnosed with PCNSL  
115 at one of three cancer centers; in 59% of cases, blood samples were lacking. Because  
116 Epstein–Barr virus (EBV)-positive PCNSL is recognized as an immunodeficiency-associated  
117 PCNSL in the current WHO CNS5 classification<sup>18,19</sup>, all participants in the study who tested  
118 negative for EBV were included. Additionally, DLBCL patients with hepatitis B virus (HBV)  
119 and HIV infection may have different mutational profiles<sup>20,21</sup>; thus, all participants in the study  
120 who tested negative for HIV and HBV were included. The key demographic and clinical  
121 characteristics of the patients are summarized in **Figure S1** and **Table S1**. The study design  
122 and flow chart are displayed in **Figure 1A**. After filtering, we identified 115,938 genetic  
123 variation events in the 140 PCNSL samples analyzed (median = 19.06 mutations/Mb, range  
124 = 0.24–91.2 mutations/Mb; median number of variants = 949.5/sample) (**Figure S2A, Figure**  
125 **S3A**).

126 We applied a filter to the 140 PCNSLs on the basis of the genes curated in the CIViC and  
127 OncoKB databases to identify candidate cancer genes with hallmark mutations in PCNSL.  
128 Some of the mutated genes were PIM1 (in 62.1% of PCNSLs), MYD88 (55.0%), KMT2D  
129 (48.6%), CD79B (45.7%), PDE4DIP (45.7%), PCLO (42.9%), BTG2 (38.6%), LRP1B (37.9%),  
130 FAT4 (37.1%), RNF213 (35%), FAT1 (34.3%), ZFH3 (33.6%), DTX1 (31.4%), KMT2C

131 (31.4%), SETD1B (31.4%), MPEG1 (29.3%), CREBBP (27.9%), ANKRD11 (27.1%), KAT6B  
132 (27.1%), BTG1 (25%), and PTEN (25%) (**Figure 1B**), which are involved in chromatin histone  
133 modification, BCR-TLR-mediated NF- $\kappa$ B signaling, immune signaling, the cell cycle, PI3  
134 kinase signaling, MAPK signaling, and Wnt/ $\beta$ -catenin signaling (**Figure S2B**)<sup>3,5,9–11,22–29</sup>. In  
135 this study, we also identified several other pathways in PCNSL, such as pathways related to  
136 genome integrity, RTK signaling, RNA abundance, TGFB signaling, TOR signaling, and  
137 apoptosis (**Figure S2B**), many of which have defined roles in other cancers<sup>30</sup>. The mutually  
138 exclusive or cooccurring relationships of these genes are shown in **Figure S3D**. Survival  
139 associated with candidate cancer genes with mutation frequencies greater than 15% plus the  
140 NOTCH2 and EZH2 genes<sup>9</sup> is shown in **Figure S4**.

141 In the search for focal copy number alterations (CNAs) in the 140 PCNSLs, we detected  
142 significant recurrent amplifications at chromosomal locations 1q21.1, 4q16.3, 11p15.5,  
143 11q12.2, 17q12, 19p13.3, 22q11.1, Yq11.221, and Yq12. We also detected deletions at 11q11,  
144 11q12.1, 14q32.33, 17q11.2, 18p11.21, 19p12, 19q13.42, and 22q11.21 (**Figure 1C**). The  
145 arm-level CNAs among all 140 PCNSL samples are displayed in **Figure S2C**. The pattern of  
146 somatic mutations caused by the different mutational processes in the genome, termed  
147 *mutational signatures*, was calculated and compared to the well-established signatures in  
148 COSMIC<sup>31</sup>. The mutational signature contributions are shown in **Figure S2D**. The COSMIC  
149 5, COSMIC 45, and COSMIC 1 signatures contributed the most to the PCNSL genome  
150 (**Figure S2E**). These factors are associated with aging, tobacco smoking, NER deficiency,  
151 the regulation of oxidative DNA damage repair, and the spontaneous deamination of 5-  
152 methylcytosine. Taken together, these results establish a comprehensive genomic landscape  
153 of PCNSL in Chinese individuals.

#### 154 **Comparison of the genomic landscapes of the discovery and validation cohorts**

155 Owing to differences in sample type between the discovery and validation cohorts (fresh  
156 tumor [discovery cohort] vs. formalin-fixed paraffin-embedded [FFPE] [validation cohort]) and  
157 the presence or absence of matched samples (paired [discovery cohort] vs. tumor-only  
158 [validation cohort]), we applied further filtering and recalibration steps to reduce false-positive  
159 calls in the validation cohort (for details, see the Methods subsection on somatic mutation



160 calling) and compared the genomic landscapes of the discovery and validation cohorts. The  
161 key demographic and clinical characteristics of the patients in the discovery and validation  
162 cohorts are summarized in **Table S2**. We identified 12,222 genetic variation events (median  
163 = 3.84 mutations/Mb, median variants = 159/sample, **Figure S3B, Figure S5A**) in the  
164 analyzed discovery cohort of PCNSL samples and 103,716 genetic variation events (median  
165 = 6.85 mutations/Mb, median variants = 1597/sample, **Figure S3C, Figure S5B**) in the  
166 analyzed validation cohort of PCNSL samples. The genetic variation profiles of the discovery  
167 and validation cohort of PCNSL samples were similar, as revealed by principal component  
168 analysis (PCA) (**Figure 2A**), but the mutation rate was higher in the validation cohort of  
169 PCNSL samples (**Figure 2B**).

170 PIM1, MYD88, CD79B, and KMT2D were the most frequently mutated candidate cancer  
171 genes of PCNSL. PIM1 (70.7%), MYD88 (63.8%), CD79B (51.7%), and KMT2D (39.7%)  
172 (**Figure S5C**) were identified in the discovery cohort, and PIM1 (56.1%), MYD88 (48.8%),  
173 CD79B (41.5%), and KMT2D (54.6%) were also observed at similar mutation frequencies in  
174 the validation cohort (**Figure S5D**). However, several of the less frequently mutated candidate  
175 cancer genes in PCNSL whose mutation frequencies were significantly different when the  
176 discovery and validation cohorts were compared included ZFH3, TRRAP, SZT2, RNF213,  
177 RANBP2, PRKDC, PDE4DIP, PCLO, NUMA1, NOTCH1, NOTCH2, KMT2C, KMT2B, KAT6B,  
178 FLT3, FAT4, FAT1, and ANKRD11 (all  $P < 0.05$ ) (**Figure 2C**). The arm-level CNAs between  
179 the discovery and validation cohort of PCNSL samples were mostly similar and are displayed  
180 in **Figure 2D**. Significant differences in both recurrent amplifications (1q, 8q, and 12p) and  
181 deletions (6p, 8p, 19p, and 19q) were observed. The results of significant recurrent focal  
182 amplifications and deletions were visualized via GISTIC 2.0 in the discovery (**Figure S5E**)  
183 and validation (**Figure S5F**) cohorts.

184 The tumor mutational burden (TMB) describes the number of mutations in one tumor  
185 sample and is often related to the prognosis of patients receiving clinical treatments<sup>32</sup>. The  
186 mutant-allele tumor heterogeneity (MATH) score reflects intratumor heterogeneity<sup>33</sup>.  
187 Microsatellite instability (MSI) arises from the impaired function of DNA mismatch repair  
188 proteins, and its molecular characteristics are regarded as significant genetic markers<sup>34</sup>.



189 Although the TMB (**Figure 2E**), MATH score (**Figure 2F**), and MSI (**Figure 2G**) were greater  
190 in the validation cohort than in the discovery cohort ( $P < 0.001$ ), the mean values were  
191 relatively close. Furthermore, the variant allele frequency (VAF) values were greater in the  
192 discovery cohort than in the validation cohort ( $P < 0.001$ , **Figure 2H**). The 3 signatures  
193 extracted from the discovery samples presented cosine similarities of 86.7%, 93.1% and 94.4%  
194 to COSMIC signatures 6, 45, and 10a, respectively (**Figure S5G**), whereas those extracted  
195 from the validation samples presented similarities of 80.4%, 70.9%, and 77.9% to COSMIC  
196 signatures 5, 1, and 23, respectively (**Figure S5H**). Taken together, these results suggest that  
197 the genetic variation profiles of the discovery and validation PCNSL samples were similar.

### 198 **The unique genomic landscape of PCNSLs in Chinese patients**

199 To date, only single-center studies with small sample sizes have reported heterogeneity in  
200 the genomic landscape among different populations of Chinese PCNSL patients<sup>15</sup>. Thus, in  
201 this large, multicenter study, we further compared the genetic landscape of our cohort with  
202 previously published PCNSL/DLBCL data. The frequencies of recurrent genetic alterations in  
203 PCNSL patients were compared with those in DLBCL patients<sup>27</sup>. Mirror bar plots (**Figure 3A**)  
204 revealed that a set of genes, such as PIM1 (62.1% vs. 16.88%), MYD88 (55% vs. 18.01%),  
205 IRF4 (15% vs. 3.98%), and EP300 (19.29% vs. 5.97%), had significantly higher mutation  
206 rates in Chinese PCNSL patients than in DLBCL patients, suggesting genetic diversity of the  
207 cancer genome between diseases. Compared with those in PCNSLs in French patients<sup>14</sup>  
208 (**Figure 3B**), the mutation frequencies of EP300 (19.29% vs. 3.48%) and KMT2D (48.6% vs.  
209 22.61%) were significantly higher in the PCNSLs of Chinese patients. Compared with those  
210 in the PCNSLs<sup>3</sup> of Japanese patients (**Figure 3C**), the mutation frequencies of MYD88 (55%  
211 vs. 85.6%) and BTG2 (38.6% vs. 87.8%) were significantly lower in the PCNSLs of Chinese  
212 patients. These data revealed a unique mutational landscape of Chinese PCNSL patients in  
213 terms of the frequency of SNVs. Next, the frequencies of recurrent SNAs with the GISTIC2.0  
214 program in Chinese PCNSL patients were compared with those in DLBCL patients. At the  
215 focal level of SNAs, Chinese PCNSL samples had significant levels of 11q12.4, 18p11.21,  
216 19q13.42, 22q11.1, and 22q11.21 deletions along with amplifications in arms 1q21.1, 4p16.3,  
217 11q12.2, and 17q12 (**Figure 3D**). Compared with PCNSLs from Japanese patients, those

218 from Chinese patients also had significant levels of deletions in arms 11q12.1, 18p11.21,  
219 19q13.42, 22q11.1, and 22q11.21 along with amplifications in arms 1q21.1, 4p16.3, 11q12.2,  
220 and 17q12 (**Figure 3E**). These results suggest genetic diversity in the PCNSL genome  
221 between races.

222 Owing to the genetic diversity of the PCNSL genome across races and the genetic diversity  
223 between the PCNSL and DLBCL cancer genomes, the existing molecular subtyping methods  
224 for PCNSL<sup>14</sup> and DLBCL<sup>9-12,35,36</sup> may not be applicable to Chinese PCNSL patients. We  
225 assessed the prognostic value of these published molecular subtypes for overall survival (OS)  
226 and progression-free survival (PFS) in our Chinese PCNSL cohort. Actionable PCNSL  
227 classification can perfectly differentiate prognoses, thereby improving precision medicine  
228 strategies. According to cell-of-origin (COO) molecular subtyping<sup>35,36</sup>, there were no  
229 significant differences in OS ( $P = 0.42$ ) or PFS ( $P = 0.67$ ) between the germinal center type  
230 (GCB) and non-GCB subtypes (**Figure S6A**). Similarly, according to LymphPlex molecular  
231 subtyping<sup>12</sup>, no significant differences in OS ( $P = 0.68$ ) or PFS ( $P = 0.71$ ) were observed  
232 between the BN2-like, MCD-like, EZB-like, N1-like, TP53, and other subtypes (**Figure S6B**).  
233 We further categorized our data on the basis of the DLBCL subtyping (C0-C5) proposed by  
234 *M. A. Shipp* et al.<sup>10</sup> Within our cohort, the C4 subtype was associated with shorter OS ( $P =$   
235  $0.009$ ,  $P = 0.013$ ) and PFS ( $P = 0.096$ ,  $P = 0.047$ ) than the C0 and C5 subtypes, respectively  
236 (**Figure S6C**). However, the overall efficacy of this DLBCL subtyping system in predicting  
237 outcomes was less than satisfactory (OS,  $P = 0.074$ ). The data were also analyzed via the  
238 five subtypes (BN2, EZB, MCD, N1, and others)<sup>9</sup> and seven subtypes (A53, BN2, EZB, MCD,  
239 N1, ST2, and others)<sup>11</sup> of DLBCL proposed by *Louis M Staudt* et al. There were no significant  
240 differences in OS ( $P > 0.05$ ) or PFS ( $P > 0.05$ ) between BN2, N1, and other categories within  
241 the 5-subtype model (**Figure S6D**). Overall, the seven-subtype model (**Figure S6E**) had  
242 inferior performance, with no significant differences observed in OS ( $P = 0.61$ ) or PFS ( $P =$   
243  $0.47$ ). With respect to the four subtypes (CS1-4) of PCNSL proposed by *A Alentorn*<sup>14</sup>, our  
244 data revealed that the OS ( $P = 0.12$ ) and PFS ( $P = 0.54$ ) of patients with the CS3 subtype  
245 were shorter than those of patients with the other three subtypes (**Figure S6F**), but the  
246 differences were not significant. Furthermore, the double-hit gene expression signature

247 defines a distinct subgroup of germinal center B-cell-like DLBCL, which is associated with a  
248 poor prognosis<sup>13</sup>. However, in this study, there were no significant differences in OS ( $P > 0.05$ )  
249 or PFS ( $P > 0.05$ ) between the double- or triple-hit PCNSL patients and the other PCNSL  
250 patients, as shown in **Figure S7** (A: all; B: discovery cohort; C: validation cohort). Taken  
251 together, these results suggest that the molecular subtyping of PCNSL and DLBCL, as  
252 previously published, is not applicable to Chinese PCNSL patients.

### 253 **PCNSL molecular subtypes with clinical outcome implications**

254 To establish a molecular classification system for PCNSL, we initially carried out consensus  
255 clustering on 58 patients (discovery cohort) who received immunochemotherapy (HD-MTX-  
256 based chemotherapy regimen) via WES data to generate cluster assignments (refer to  
257 Methods - Classification model to identify molecular types). The molecular classification  
258 scheme, presented in **Figure 4A**, **Table S3** and **Figure S8**, was determined independently  
259 of clinical information and finalized before the analysis of clinical data, allowing us to analyze  
260 the relationships between genetic subtypes and survival in this entire cohort. Finally, EP300,  
261 BTG1, MYD88, and IRF4 were included in the molecular subtyping of Chinese PCNSLs.

262 All nonsynonymous mutations in EP300, BTG1, MYD88, and IRF4 were visualized within  
263 the functional domains of the encoded proteins (**Figure S9**). As previously reported<sup>10,37,38</sup>,  
264 MYD88 (L265P) was the most prevalent mutation, while EP300, BTG1, and IRF4 all harbored  
265 scattered mutations. We evaluated the prognostic significance of these four identified genes  
266 for OS and PFS. The survival outcomes of patients with EP300 mutations were significantly  
267 poorer than those of patients with wild-type EP300, and patients harboring mutations in either  
268 BTG1 (OS,  $P = 0.017$ ; PFS,  $P = 0.12$ ), MYD88 (OS,  $P = 0.016$ ; PFS,  $P = 0.069$ ), or IRF4 (OS,  
269  $P = 0.045$ ; PFS,  $P = 0.018$ ) had favorable OS (**Figure S10A**) and PFS (**Figure S10B**) relative  
270 to individuals with their wild-type counterparts.

271 In the discovery cohort, we identified three subtypes of PCNSL: BMI ( $n = 16$ , 27.59%), E3  
272 ( $n = 9$ , 15.52%), and UC ( $n = 33$ , 56.90%). The E3 subtype was defined as those with  
273 mutations in the EP300 gene. The PCNSLs that carried mutations in at least two of the three  
274 genes, BTG1, MYD88, and IRF4, were characterized as the BMI subtype. The other PCNSLs  
275 that did not fit into either of these categories were classified under the UC subtype

276 (Unclassified). The three subtypes differed significantly in OS ( $P < 0.001$ ) and PFS ( $P =$   
277  $0.043$ ), the BMI subtype ( $P < 0.001$ ,  $P = 0.023$ ) had much more favorable outcomes than the  
278 E3 and UC subtypes did, and the E3 subtype ( $P < 0.001$ ,  $P = 0.037$ ) had far worse outcomes  
279 than the BMI and UC subtypes did (**Figure 4B**). These differences between the three  
280 subtypes of PCNSL were detected in the validation cohort (OS,  $P = 0.020$ ; PFS,  $P = 0.048$ ;  
281  $n = 82$ , tumor-only sample), and patients with E3 had significantly shorter survival times than  
282 those with BMI (OS,  $P = 0.007$ ) or UC (OS,  $P = 0.043$ ) (**Figure 4C**). Similar results were  
283 observed in the entire cohort ( $n = 140$ , OS,  $P < 0.0001$ ; PFS,  $P = 0.0004$ ; **Figure S10C**): 26  
284 patients were classified as BMI (18.57%), 27 as E3 (19.29%), and 87 as UC (62.14%).  
285 Furthermore, the raw WES or WGS data, along with follow-up data from an independent  
286 cohort of 36 Chinese patients with PCNSL<sup>17</sup>, were obtained. The three identified subtypes  
287 significantly differed in OS ( $P = 0.0004$ ; **Figure 4D**). Specifically, the BMI subgroup ( $P =$   
288  $0.0004$ ,  $P = 0.005$ ) had notably more favorable outcomes than the E3 and UC subgroups did.  
289 Conversely, the E3 subtype ( $P = 0.0004$ ,  $P = 0.0231$ ) had considerably worse outcomes than  
290 either the BMI or UC subgroup did. These results further validate the robustness of our  
291 molecular classification.

292 BTK inhibitors have been shown to improve the prognosis of PCNSL patients by blocking  
293 B-cell receptor signaling pathways, which influence the growth and survival of B cells.  
294 Consequently, we further analyzed whether the use of BTK inhibitors affects the robustness  
295 of our classification. There were no significant differences in OS ( $P > 0.05$ , **Figure S11A**) or  
296 PFS ( $P > 0.05$ , **Figure S11B**) between patients who received BTK inhibitors ( $n = 8$ ) and those  
297 who did not receive BTK inhibitors ( $n = 132$ ). Additionally, after initial treatment options (HD-  
298 MTX combined with idarubicin (IDA), HD-MTX combined with rituximab (R), HD-MTX  
299 combined with IDA and R, or a combination of BTK inhibitors) and consolidated therapy  
300 (WBRT, stem cell transplant) were adjusted, multivariable Cox regression analysis revealed  
301 that the use of different treatment options did not affect the robustness of our classification  
302 (**Table S4**).

303 For the E3 subtype, the mean mutation prevalence in the PCNSLs of Asian patients  
304 (16.88%) was significantly higher than that in the PCNSLs of Western patients (5.26%)

305 **(Figure 5A)**. Patients with the E3 subtype had significantly poorer survival, which was not  
306 affected by the mutation site (OS,  $P = 0.82$ ; PFS,  $P = 0.69$ ; **Figure 5B**). Univariate Cox  
307 regression analysis revealed that PCNSL molecular subtypes are associated with clinical  
308 outcomes (**Table S5**), which was also confirmed by multivariate Cox regression hazard ratio  
309 analysis after adjusting for important confounders (age, IELSG, MSKCC, LDH levels, deep  
310 brain location, and CSF protein levels) (**Figure 4E**). These findings further confirmed that  
311 PCNSL molecular subtypes are associated with clinical outcomes. The key demographic and  
312 clinical characteristics of the three MS patients are summarized in **Table S6**.

313 We also constructed a Sankey diagram to visualize the correspondence between our  
314 samples and the previously described genetic subtypes of PCNSL and DLBCL (**Figure 4F**).  
315 The Chinese PCNSL subtypes were significantly distinct from those previously described.  
316 Taken together, these results indicate that three unique molecular subtypes of Chinese  
317 PCNSL are associated with clinical outcomes.

### 318 **Genomic landscape and tumor microenvironment across PCNSL subtypes**

319 We further aimed to determine whether these three molecular subtypes of Chinese PCNSL  
320 patients could affect the mutational landscape, oncogenic pathways and tumor  
321 microenvironment. Intergroup mutation distribution analysis was performed to identify unique  
322 and shared mutations. A total of 6,102 (median variants per sample = 196.5), 41,548 (median  
323 variants per sample = 1719), and 73,440 mutated genes (median variants per sample = 918)  
324 were identified in the BMI, E3, and UC subtypes, respectively, with 518 mutated genes shared  
325 among the three subtypes (**Figures 6A** and **S12A**). Key candidate cancer genes in the 140  
326 PCNSL patients, grouped by these three subtypes, are presented in **Figure 6B**. The mutation  
327 frequencies of EP300, MYD88, IRF4, PCLO, FAT4, KMT2C, KMT2A, MPEG1, PRKDC,  
328 SPEN, CARD11, RANBP2, NUMA1, NSD1, PASK, USP6, PTPN13, SLX4, ADGRA2, TET1,  
329 and NOTCH2 were significantly different ( $P < 0.05$ ) among these three subtypes. Arm-level  
330 CNAs among the samples of the three subtypes are displayed in **Figure 6C**, showing  
331 significant differences in recurrent deletions (in 6q and 12p) but not in amplifications (**Figure**  
332 **6D**). The results of significant recurrent focal amplifications and deletions were visualized by  
333 GISTIC 2.0 in the BMI, E3, and UC subtypes (**Figure 12B**). There was no significant

334 difference ( $P > 0.05$ ) in the MATH (**Figure 6E**) or MSI (**Figure 6F**) scores among the three  
335 subtypes, but the TMB was greater in the E3 subgroup than in the BMI ( $P < 0.0001$ ) or UC  
336 subgroup ( $P < 0.001$ ) (**Figure 6G**). Furthermore, the VAF was lower in the E3 subgroup than  
337 in the BMI ( $P < 0.0001$ ) or UC subgroup ( $P < 0.001$ ) (**Figure 6H**).

338 The contributions of mutational signatures across the three subtypes are illustrated in  
339 **Figure S12C**. The three signatures extracted from the E3 subtype samples displayed cosine  
340 similarities of 82.0%, 93.8%, and 95.2% to the COSMIC signatures 6, 10a, and 45,  
341 respectively (**Figure S12D**). In contrast, those extracted from BMI subtype samples  
342 presented similarities of 77.3%, 81.7%, and 58.3% to COSMIC signatures 5, 84, and 87,  
343 respectively (**Figure S12D**). The signatures from the UC subtype samples were 80.8%,  
344 70.3%, and 91.7% and similar to the COSMIC signatures 5, 1, and 45 (**Figure S12D**),  
345 respectively.

346 Hematoxylin–eosin (H&E) and immunohistochemical (IHC) staining of CD2, CD5, CD10,  
347 CD19, CD20, CD79a, Ki-67, BCL2, BCL6, MUM1, c-Myc, and p53 from samples of different  
348 PCNSL subtypes revealed significant malignant progression in patients with the E3 subtype  
349 of PCNSL, as shown in **Figure S13A** and **Table S7**. This is evidenced by the formation of  
350 poorly differentiated and aggressively growing tumors (Ki-67), which contrasts with the other  
351 two subtypes. Immunostaining revealed a greater presence of CD2+, CD5+, CD10+, CD19+,  
352 CD20+, and CD79a+ cells in the E3 subtype. Additionally, a greater presence of BCL2+,  
353 BCL6+, MUM1+, and c-Myc+ cells, which are markers associated with the diagnosis of B-cell  
354 lymphomas<sup>39</sup>, was observed in the E3 subtype.

355 To explore potential therapeutic strategies for the genetic subtypes of PCNSL, we  
356 examined groups of genetic aberrations that target oncogenic signaling pathways (**Figure**  
357 **S13B**). Genetic events affecting NF- $\kappa$ B regulators that negatively regulate the stability of NF-  
358  $\kappa$ B-dependent mRNAs were detected in 85.2% and 84.6% of the E3 and BMI subtype  
359 samples but not in the UC subtype samples ( $P < 0.05$ ). These findings suggest that the E3  
360 and BMI subtypes may be more responsive to BTK inhibitors<sup>40</sup>. The PI3 kinase pathway, a  
361 pathway that can indirectly activate NF- $\kappa$ B, is genetically altered in 66.7% of E3 patients<sup>41</sup>.  
362 We also noted a higher frequency of genetic alterations in chromatin histone modifiers (100%),



363 RTK signaling (77.8%), protein homeostasis/ubiquitination (66.7%), cell cycle pathways  
364 (77.8%), genome integrity (82.5%), Wnt/B-catenin signaling (59.3%), the chromatin SWI/SNF  
365 complex (70.4%), and splicing (37%) in E3 patients. Therefore, a combination of cyclin D-  
366 Cdk4,6 and PI3 kinase inhibitors might be beneficial for patients with the E3 subtype.

367 Taken together, these results suggest that the three molecular subtypes of PCNSL in  
368 Chinese patients each have a unique genomic landscape, tumor microenvironment, and  
369 oncogenic pathways.

### 370 **Mutational landscape and oncogenic pathways in PCNSLs with different sites of onset**

371 Next, we aimed to determine whether the site of PCNSL onset in Chinese patients  
372 influences the mutational landscape and oncogenic pathways. **Figure 7A** shows that the  
373 areas most often affected by PCNSL were the basal ganglia, brainstem, cerebellum, corpus  
374 callosum, frontal lobe, occipital lobe, parietal lobe, temporal lobe, thalamus, and ventricles,  
375 as well as combinations of multiple sites. The most frequently involved sites of PCNSL were  
376 the frontal lobe (22.14%), temporal lobe (15.71%), and basal ganglia (8.57%).

377 First, we found that there was no significant difference in the proportion of different disease  
378 sites among the three subtypes (chi-square test, corpus callosum,  $P = 0.887$ ; basal ganglia,  
379  $P=0.645$ ; thalamus,  $P= 0.317$ ; brainstem,  $P= 1.000$ ; ventricle,  $P= 0.631$ ; front lobe,  $P= 0.576$ ;  
380 multiple,  $P= 0.949$ ; temporal lobe,  $P= 0.214$ ; cerebellum,  $P= 0.831$ ; occipital lobe,  $P= 0.778$ ;  
381 parietal lobe,  $P= 0.887$ ). BMI-related tumors were slightly more prevalent in the temporal lobe  
382 (7 out of 26 patients vs. 15 out of 114 patients, chi-square test  $P = 0.082$ ) than other subtypes  
383 were. Conversely, E3 events were likely to be more frequent in the thalamus (2 out of 27  
384 cases vs. 2 out of 113 cases, chi-square test  $P = 0.113$ ). Larger studies are needed to confirm  
385 this observation.

386 Next, we explored whether the tumor sites differed between the discovery and validation  
387 cohorts. As shown in **Figure S14A**, there was no significant difference in the proportions of  
388 different disease sites between the discovery and validation cohorts (chi-square test  $P =$   
389  $0.610$ ). Furthermore, the proportions of deep brain lesions in the discovery and validation  
390 cohorts were not significantly different ( $P = 0.478$ ).

391 Sixteen mutated genes were represented among all the sites (**Figure 7B**). Key candidate



392 cancer genes in the 140 PCNSL patients, grouped by site of disease onset, are presented in  
393 **Figure 7C**. Mutations in the PIM1, CD79B, and MYD88 genes were relatively common across  
394 all PCNSL onset sites. The frontal lobe had the highest mutation frequencies of five genes:  
395 PIM1 (51.61%), MYD88 (51.61%), PDE4DIP (48.39%), PCLO (48.39%), and ZFHX3  
396 (48.39%). In the temporal lobe, the most prevalent mutations were in PIM1 (68.18%),  
397 PDE4DIP (63.64%), PCLO (59.09%), RNF213 (59.09%), and MYD88 (54.55%), with no  
398 mutations observed in MET, PIK3CA, or TSC1. In the basal ganglia, the genes with the  
399 highest mutation frequencies were PIM1 (66.67%), PDE4DIP (58.33%), MYD88 (50%),  
400 ZFHX3 (41.67%), and DTX1 (41.67%). The mutation frequencies of LRP1B and KMT2D were  
401 significantly different ( $P < 0.05$ ) among these sites. Arm-level CNAs among the samples of  
402 these sites are displayed in **Figure 7D**, and significant differences in both recurrent  
403 amplifications (2q, 10q, and 10p) and deletions (9p) were observed. The difference in the  
404 MATH score was significant ( $P < 0.05$ ) (**Figure 7E**) across these sites, but there was no  
405 significant difference ( $P > 0.05$ ) in the TMB (**Figure 7F**) or MSI (**Figure 7G**) score between  
406 several sites.

407 Next, we further divided the tumor sites into deep brain and shallow brain tumor subgroups.  
408 A total of 854 (81%) mutated genes were represented between the deep brain and shallow  
409 brain tumor subgroups (**Figure S14B**). The mutational landscape between deep brain and  
410 shallow brain tumors is shown in **Figure S14C**. The mutation frequencies of LRP1B, FAT1,  
411 KMT2B, CIC, PTPRB, MAP3KI, ARID1B, and CPS1 in the deep brain and shallow brain  
412 tumors were significantly different ( $P < 0.05$ ). Arm-level CNAs between deep brain and  
413 shallow brain tumors are displayed in **Figure S14D**, and no significant differences ( $P > 0.05$ )  
414 in either recurrent amplification or deletion were observed. There was no significant difference  
415 ( $P > 0.05$ ) in the MATH (**Figure S14E**), TMB (**Figure S14F**), or MSI (**Figure S14G**) score  
416 between deep brain and shallow brain tumors.

417 We further conducted pathway enrichment analysis (**Figure 7H**) and revealed significant  
418 involvement of NF- $\kappa$ B signaling in the tumors of patients with onset in the parietal lobe and  
419 brainstem, each with an involvement rate of 100%. We also noted a significant difference ( $P$   
420  $< 0.05$ ) in the frequency of genetic alterations in transcription factors, other chromatin, immune

421 signaling, NF- $\kappa$ B signaling, chromatin histone modifiers, RTK signaling, PI3K signaling, RNA  
422 abundance, the chromatin SWI/SNF complex, protein homeostasis/ubiquitination, and the  
423 cell cycle among these sites. Furthermore, we noted a significant difference ( $P < 0.05$ ) in the  
424 frequency of genetic alterations in the chromatin SWI/SNF complex but not in the other  
425 pathways (**Figure S14H**). Taken together, these results indicate that the mutational  
426 landscape in Chinese patients with PCNSL varies between sites of onset.

427

## 428 **Discussion**

429 Owing to the genetic, phenotypic, and tumor microenvironment heterogeneity of PCNSL,  
430 identifying classification and prognostic biomarkers for patients is extremely challenging,  
431 which in turn makes developing effective new therapies challenging. Here, we performed a  
432 study of 140 Chinese PCNSL patients that was adequately powered to expand the genomic  
433 landscape and explore its clinical significance utilizing an unprecedented sample size and a  
434 multicenter approach. We defined recurrent mutations, CNAs, and associated cancer  
435 candidate genes in Chinese PCNSL patients and compared these comprehensive genetic  
436 signatures with those of PCNSL patients and systemic DLBCL patients of other races,  
437 revealing that genetic heterogeneity is a defining feature of PCNSL. Our results highlight the  
438 complexity of PCNSLs, which have a median of 19.06 mutations/Mb and a median of 949.5  
439 variants per sample.

440 Although the genetic variation profiles of the PCNSL discovery and validation samples were  
441 similar, notable differences were evident in the mutation frequencies of certain genes (e.g.,  
442 NOTCH1, NOTCH2, and KMT2C), the TMB, the MSI, and the MATH score. These  
443 discrepancies might stem from variations in specimen types (fresh tissue versus FFPE) and  
444 the absence of paired samples in the validation cohort<sup>42</sup>. Furthermore, genetic heterogeneity  
445 between patient populations<sup>15</sup> may be the main reason why the published classifications for  
446 DLBCL and PCNSL are not applicable to Chinese PCNSL patients.

447 More importantly, in our study, we identified three robust molecular subtypes of PCNSL in  
448 Chinese patients: BMI, E3, and UC. Distinct clinical outcomes, activated cellular pathways,  
449 and alterations in the genetic landscape distinguish the three subtypes and could be utilized

450 to personalize therapy for patients with different subtypes. For the E3 subtype, the mean  
451 mutation rate was significantly higher in the PCNSLs of Chinese and Japanese patients  
452 (16.88%) than in those of Western PCNSL patients (5.26%). This difference may be attributed  
453 to variations in age, lifestyle, and Epstein–Barr virus infection rates<sup>17,19,43</sup>. Patients with the  
454 E3 subtype had significantly poorer survival outcomes, a finding that is consistent with  
455 reported findings in DLBCL<sup>44</sup>. EP300 and CREBBP are two closely related members of the  
456 KAT3 family of histone acetyltransferases that function similarly<sup>45</sup>. However, in this study, the  
457 survival patients with EP300 mutations was significantly poorer, whereas CREBBP mutations  
458 did not contribute to an inferior prognosis (**Figure S4**). This discrepancy might stem from the  
459 distinct roles of EP300 and CREBBP in PCNSL. Specifically, in a recent study, EP300, but  
460 not CREBBP, was reported to play an essential role in supporting the viability of classical  
461 Hodgkin's lymphoma by directly modulating the expression of the oncogenic MYC/IRF4  
462 network, surface receptor CD30, immunoregulatory cytokine interleukin 10, and immune  
463 checkpoint protein PD-L1<sup>46</sup>. The molecular mechanisms through which EP300 mutations  
464 facilitate the progression of PCNSL are still not understood. We plan to explore these  
465 mechanisms in a forthcoming study.

466 PCNSLs that carried mutations in at least two of three genes, namely, BTG1, MYD88, and  
467 IRF4, were characterized as the BMI subtype with favorable survival outcomes. The  
468 prognostic significance of MYD88 mutations in PCNSL patients remains inconclusive. While  
469 several studies have reported no effect on OS<sup>47–50</sup>, only two have reported an unfavorable  
470 outcome<sup>51,52</sup>. In line with our findings, *Olimpia* et al.<sup>53</sup> and *Claudio* et al.<sup>54</sup> have indicated that  
471 the survival time is significantly longer in patients with PCNSLs harboring MYD88 mutations.  
472 This discrepancy may be attributed to heterogeneity in genetics, phenotype, and the tumor  
473 microenvironment across various patient populations; variances in sample size; and the  
474 adjustment of confounding variables, including age and treatment methods. In this large study,  
475 we found that Chinese PCNSL patients harboring MYD88 mutations have longer survival  
476 times. However, further research is needed to verify these findings in diverse populations.  
477 The associations of IRF4 and BTG1 mutations with clinical outcomes in PCNSL patients have  
478 not been previously reported. This results of this study revealed that mutations in both IRF4

479 and BTG1 were associated with favorable outcomes. IRF4 has been identified as a driver  
480 oncogene that transcriptionally regulates downstream target genes, such as MYC, and  
481 coordinates the transcriptional program with NF- $\kappa$ B references<sup>55–58</sup>. Numerous in vitro and  
482 clinical studies have highlighted the abnormal overexpression and oncogenic roles of IRF4  
483 in various mature lymphoid neoplasms<sup>58–61</sup>. Therefore, we hypothesized that the reduced  
484 expression and/or decreased transcriptional activity of IRF4 resulting from such mutations  
485 may explain the association of IRF4 mutations with favorable survival outcomes in PCNSL  
486 patients. BTG1 mutation has been associated with extranodal dissemination and unfavorable  
487 outcomes in B-cell lymphoma patients<sup>62–64</sup>. However, in this study, BTG1 mutation was linked  
488 to favorable outcomes in PCNSL patients. In a substantial discovery cohort consisting of 533  
489 patients with B-cell precursor acute lymphoblastic leukemia, *Blanca* and colleagues<sup>65</sup>  
490 reported that deletions of BTG1 alone did not affect prognosis. The complete remission rate  
491 among acute myeloid leukemia patients with low BTG1 expression was significantly greater  
492 than that among patients with high BTG1 expression<sup>66</sup>. The molecular mechanisms through  
493 which mutations in BTG1 decelerate the progression of PCNSL warrant further research.

494 This study has several limitations. First, the proportion of unclassified PCNSLs (UC  
495 subtypes) is high, possibly due to the lack of multiomics data needed for classification.  
496 However, the three-class classification based on WES proposed in this study has strong  
497 clinical practicality and translational value, as it relies solely on the four genes identified  
498 through WES. In other words, clinicians can predict patient outcomes and further perform  
499 individualized management of PCNSLs by detecting mutations in these four genes without  
500 the need for additional multiomics testing. Second, the three identified molecular subtypes  
501 can be used to predict patient outcomes. However, it remains challenging to determine  
502 whether these three molecular subtypes can still be used to accurately distinguish biological  
503 subtypes without additional RNA-seq data layers.

504 In summary, by performing WES on tumor specimens from 140 Chinese PCNSL patients,  
505 we identified three molecular subtypes that can be used to predict patient outcomes. These  
506 genetic signatures associated with PCNSL outcomes illuminate the path toward  
507 individualized management of PCNSL patients and the discovery of novel treatment

508 strategies for this challenging disease.

509

## 510 **METHODS**

### 511 **Sample collection and clinicopathological features of PCNSL patients**

512 In this study, a total of 140 newly diagnosed PCNSL patients were retrospectively enrolled  
513 from January 2010 to December 2020 from three independent medical centers, namely,  
514 Huashan Hospital of Fudan University, Renji Hospital of Shanghai Jiao Tong University, and  
515 Shanghai Cancer Center of Fudan University. The study comprised two cohorts: the  
516 discovery cohort, which included 58 patients from Huashan Hospital of Fudan University,  
517 Shanghai; and the validation cohort (n = 82), which consisted of 25 patients from Huashan  
518 Hospital of Fudan University, 51 patients from Renji Hospital of Shanghai Jiao Tong University,  
519 and 6 patients from Shanghai Cancer Center of Fudan University. In the discovery cohort,  
520 paired blood samples were also obtained for analysis in conjunction with each tumor sample.  
521 In the validation cohort, only unpaired FFPE tumor tissue samples were obtained for analysis.

522 None of the patients had received steroid treatment for PCNSL, and PCNSL tumors were  
523 diagnosed on the basis of the World Health Organization criteria<sup>13</sup>. All patients underwent a  
524 2-deoxy-2[F-18] fluoro-D-glucose positron emission tomography/computed tomography  
525 (FDG PET/CT) scan and bone marrow aspiration to exclude systemic tumor manifestation  
526 on the basis of the guidelines of the International PCNSL Collaborative Group<sup>67</sup> and the  
527 European Association of Neuro-Oncology<sup>68</sup>. PCNSL patients for whom ocular involvement  
528 was present were excluded. Each tumor tissue sample was independently reviewed by at  
529 least 2 pathologists to confirm that the tumor sample was histologically consistent with the  
530 PCNSL. All patients underwent long-term follow-up, which ran to December 30, 2022. The  
531 detailed clinical parameters of the 140 PCNSL patients are presented in **Table S1 and Figure**  
532 **S1A**.

### 533 **Ethics statement**

534 This study was conducted with the approval of the Institutional Review Boards at Huashan  
535 Hospital of Fudan University (Approval No. 2022-529), Shanghai Cancer Center of Fudan  
536 University (Approval No. 1612167-18), and Renji Hospital of Shanghai Jiao Tong University

537 (Approval No. LY2024-112-C). All participants provided written informed consent before  
538 participating in the clinical study and before the collection of tumor tissues. The research was  
539 carried out in strict adherence to the ethical principles of the Declaration of Helsinki and  
540 conformed to international norms of good clinical practice.

#### 541 **Treatment Regimens**

542 All PCNSL patients were treated with HD-MTX-based combination immunochemotherapy.  
543 The following chemotherapy protocols were used for induction: HD-MTX combined with IDA,  
544 HD-MTX combined with R, HD-MTX combined with IDA and R, or a combination of BTK  
545 inhibitors. Whole-brain radiation therapy or stem cell transplantation is a form of consolidated  
546 therapy. The detailed therapeutic schedule was the same as that previously described<sup>69</sup>.

#### 547 **Sample processing**

548 The collection and processing of samples for this study were carried out by the Department  
549 of Pathology or Department of Neurosurgery at Huashan Hospital of Fudan University, Renji  
550 Hospital of Shanghai Jiao Tong University, and Shanghai Cancer Center of Fudan University.  
551 In the discovery cohort, surplus tumor tissues and paired blood samples obtained during  
552 surgical procedures were collected. To guarantee the quality of these samples, each  
553 specimen was promptly and accurately labeled with relevant patient information within 30  
554 minutes of collection and then immediately snap-frozen in liquid nitrogen. These samples  
555 were stored at -80°C until being shipped to GenomiCare Biotechnology (Shanghai, China).  
556 In the validation cohort, the residual tumor tissue specimens were subjected to FFPE. These  
557 FFPE samples were transported in a dry ice container to Sinotech Genomics Technologies  
558 in Shanghai, China, accompanied by a time and temperature tracker to ensure proper  
559 monitoring during shipment. Upon arrival, the samples were promptly stored in liquid nitrogen  
560 to maintain their integrity until further processing.

#### 561 **DNA extraction**

562 For frozen fresh tissue and matched peripheral blood samples, total genomic DNA (gDNA)  
563 was extracted via the Maxwell RSC Blood DNA Kit (AS1400, Promega) on a Maxwell RSC  
564 system (AS4500, Promega) following the manufacturer's instructions. For FFPE tissue, total  
565 gDNA was extracted via the QIAamp DNA FFPE Tissue Kit (56404, Qiagen) following the



566 manufacturer's instructions. The integrity and concentration of the gDNA were determined via  
567 the Qsep100 System (BIOptic, China) and a Qubit 3.0 fluorometer (Thermo Fisher Scientific).  
568 The OD<sub>260</sub> was measured with a NanoDrop One (Thermo Fisher Scientific).

### 569 **WES library preparation and sequencing**

570 For frozen tissue and matched peripheral blood samples, exome DNA was extracted via  
571 the SureSelect Human All Exon V7 Kit (5991-9039EN, Agilent). The library was subsequently  
572 prepared via the SureSelectXT Low Input Target Enrichment and Library Preparation system  
573 (G9703-90000, Agilent). For the FFPE sample, the exome DNA was captured via the  
574 SureSelect Human All Exon V8 Kit (5191-6874, Agilent) and prepared into a library via the  
575 SureSelect XT HS2 DNA Reagent Kit (G9983A, Agilent). The library was validated via the  
576 use of an Agilent 2100 Bioanalyzer and a Qubit 3.0 fluorometer. Paired-end 150 bp read  
577 sequencing was performed on an Illumina NovaSeq 6000. Image analysis and base calling  
578 were performed via onboard RTA3 software (Illumina).

### 579 **Somatic mutation calling**

580 Quality control was conducted via FastQC software. The cleaned and trimmed FASTQ files  
581 were aligned to the UCSC human reference genome (hg19) via the Burrows–Wheeler Aligner  
582 (BWA) with default parameters. For each paired blood sample, SNVs and short  
583 insertions/deletions (INDELs) were identified via Sentieon TNseq<sup>70</sup> with default parameters.  
584 The identified somatic mutations were removed if they did not satisfy any one of the following  
585 criteria: a variant allele frequency (VAF) of at least 0.05, support from a minimum of three  
586 reads, annotation by the Variant Effect Predictor (VEP) package<sup>71</sup>, and transformation into a  
587 mutation annotation format (MAF) file for further analysis with maftools<sup>72</sup>.

588 When a paired normal sample was not available, a panel of normal (PON) files was used  
589 as a paired control to call the SNVs and InDels. A panel of normal files was created using the  
590 reads from clinical blood samples that showed no evidence of tumor contamination from 100  
591 different individuals collected by Genomicare Biotechnology (Shanghai). The reads were  
592 retained when they passed the standard WES QC, as described in the WES subsection. The  
593 reads for reference alleles and alternative alleles were gathered for each candidate site in all  
594 100 samples, except for false positives, which were those exhibiting a candidate allele



595 frequency exceeding 0.05 in more than 5 samples.

596 We applied an additional PON mask for all the candidate somatic SNV and INDEL sites to  
597 exclude germline mutations, as previously reported<sup>10,73</sup>. In general, in addition to the standard  
598 retention rules, mutations were retained if they were known driver alterations highlighted as  
599 being biologically significant in the COSMIC database. Mutations with a tumor mutation  
600 frequency  $\geq 20\%$  were also retained. Other germline mutations were retained if their existence  
601 ratio in the Exome Aggregation Consortium (ExAC) `exac_all` was  $< 0.00005$ , their existence  
602 ratio in the Asian population `exac_eas` was  $< 0.0003$ , and their existence ratio in previous  
603 GenomiCare samples `germline_gc` was  $< 0.0006$ . Retained mutations were considered  
604 somatic mutations.

605 Thus, the PON file and PON mask limit possible recurrent artifacts of sequencing and the  
606 presence of germline mutations in somatic mutations that are falsely selected owing to a lack  
607 of paired blood data.

### 608 **Somatic copy number alteration calling and profiling**

609 Using the method described in the ExomeCNV package<sup>74</sup>, we implemented a normalized  
610 depth–coverage ratio method to identify CNVs in paired samples. To correct for five potential  
611 biases (the size of exonic regions, batch effects, both the quantity and quality of sequencing  
612 data, local GC content, and genomic mappability) that affect the raw read counts, we utilized  
613 a standard normal distribution model. Genes with a haploid copy number  $\geq 3$  or  $\leq 1.2$  were  
614 defined as amplified or deleted, respectively, and a minimum tumor content (purity) of 20%  
615 was needed.

### 616 **Significance analysis of recurrent somatic copy number alterations**

617 Sequenza<sup>75</sup> was used to generate the segment files. The segment files were used as the  
618 input for GISTIC2.0<sup>76</sup> to detect recurrent arm-level and focal peaks in copy number alterations  
619 via the parameters `-js 40 -conf 0.99 -ta 0.2 -td 0.2 -brlen 0.8`, with other parameters set to the  
620 defaults.

### 621 **Cancer-related gene filtering**

622 After the aforementioned steps of calling SNVs and CNVs, we further filtered the resulting  
623 mutated genes by intersecting them with a designated group of genes recognized as cancer-

624 related genes. This group of genes was sourced from two prominent public cancer gene  
625 databases. Part 1 of the group was obtained from the OncoKB curated cancer gene list  
626 (<https://www.oncokb.org/cancerGenes>)<sup>77</sup>. These genes are classified as cancer genes by  
627 OncoKB on the basis of their inclusion in various sequencing panels, the Sanger Cancer  
628 Gene Census, or the criteria established by *Vogelstein et al.*<sup>78</sup>. Part 2 was derived from the  
629 ranked CIViC gene candidates table ([https://github.com/griffithlab/civic-  
630 server/blob/master/public/downloads/RankedCivicGeneCandidates.tsv](https://github.com/griffithlab/civic-server/blob/master/public/downloads/RankedCivicGeneCandidates.tsv))<sup>79</sup>. The final list of  
631 cancer-related genes consisted of all genes in Part 1 and genes in Part 2 only when its  
632 'panel\_count' value (in the CIViC tsv file listed above) was  $\geq 2$ .

### 633 **Bioinformatic analysis**

634 The mutational signature classification was based on all single-base substitution (SBS)  
635 signatures of the COSMIC mutational signatures<sup>80</sup>. TMB was defined as the aggregate count  
636 of somatic nonsynonymous mutations, including SNVs or INDELs, within the tumor exome  
637 for each patient<sup>81</sup>. This count was then divided by the overall size of the targeted regions (35  
638 for WES), resulting in the TMB, expressed in counts per megabase (counts/Mb). The MATH  
639 score<sup>33</sup> was calculated on the basis of the width of the variant allele frequency (VAF)  
640 distribution, utilizing maftools for the analysis<sup>72</sup>. The pathway map was generated via  
641 maftools as previously described<sup>30</sup>.

### 642 **Classification model for identifying molecular types**

643 CoxNet survival analyses and least absolute shrinkage and selection operator (LASSO)  
644 regressions were performed via the scikit-learn package in Python (version 3.9.7). K–M  
645 survival curves (log-rank test) were used for OS analysis via the survival and survminer  
646 packages in R (version 4.1.2). The molecular classification scheme is detailed as follows and  
647 is presented in **Figure 4A, Table S3 and Figure S7**.

#### 648 (1) Selection of 24 initial features in the discovery cohort

649 Molecular features derived from SNVs were selected to develop subsequent classification  
650 models.

651 First, to identify genes with high variability for use in clustering, those with low mutation  
652 frequencies were filtered out. This process led to the selection of genes with a mutation

653 frequency greater than 5% for clustering purposes. A total of 150 genes were screened for  
654 further analysis.

655 In the second phase, OS was analyzed as the dependent variable, with the aforementioned  
656 150 genes serving as independent variables. The feature selection steps were as follows: (1)  
657 a comprehensive approach involving CoxNet survival analyses and LASSO regressions was  
658 employed to identify characteristic genes; (2) the importance score of each feature in the  
659 model was calculated and ranked in descending order; (3) features that ranked in the top 50%  
660 were recorded as potential features once; (4) processes 1-3 were repeated 500 times, and  
661 all potential features were recorded; and (5) among the feature sets obtained in the above  
662 process, those recorded more than 250 times were selected.

663 Ultimately, 24 feature genes, namely, EP300, KMT2D, MPEG1, TUSC3, MYD88, PTCH1,  
664 DST, ZNF521, BTG1, NOTCH2, PRDM1, ADGRL3, CDH11, CREBBP, ATRX, TCL1A,  
665 GNA13, ETV6, IRF4, HIST2H3D, CD79B, GRM8, MYH11, and SPTA1, were selected.

#### 666 (2) Differential feature selection

667 To determine the most suitable features among the initial 24 for the classification model,  
668 Kaplan–Meier analyses were conducted. Features qualifying for further analysis met the  
669 following criteria: a log-rank test P value of less than 0.2 and any group with more than 5  
670 patients. Ultimately, 6 DEGs, namely, EP300, CREBBP, DST, MYD88, BTG1, and IRF4, were  
671 identified.

#### 672 (3) Model training utilizing random combinations of 6 differential features

673 To adhere to clinical practice guidelines for predicting patient outcomes and implementing  
674 individualized management strategies for PCNSL patients, patients with PCNSL were  
675 categorized into three subgroups (those with good, poor, and intermediate prognoses) in the  
676 present study. Six differential features were ultimately selected for building a classification  
677 model to classify patients into the three subtypes. These features were randomly combined  
678 to form three types, yielding a total of 288 combinations. To identify the most appropriate  
679 classification model among these combinations, Kaplan–Meier analyses were performed.  
680 Models were chosen on the basis of a log-rank test P value of less than 0.05 and subgroup  
681 sample sizes greater than 8. Ultimately, seven candidate molecular subtype combinations

682 met these criteria: (molecular markers shown in the format of subtype 1 vs. subtype 2 vs.  
683 subtype 3): ① EP300 (predominant) vs. MYD88/BTG1/IRF4 $\geq$ 2 vs. others; ② EP300 vs.  
684 MYD88/BTG1/IRF4 $\geq$ 2 (predominant) vs. others; ③ BTG1 (predominant) vs. CREBP/DST $\geq$ 1  
685 vs. others; ④ BTG1 vs. CREBP/DST $\geq$ 1 (predominant) vs. others; ⑤ BTG1/IRF4 $\geq$ 1 vs.  
686 EP300/CREBP/DST $\geq$ 1 vs. others; ⑥ BTG1/IRF4 $\geq$ 1 vs. EP300/DST $\geq$ 1 vs. others; and ⑦  
687 CREBP/DST $\geq$ 1 vs. MYD88/BTG1/IRF4 $\geq$ 2 vs. others.

#### 688 (4) Validation of candidate molecular subtypes

689 The WES data and OS data of 82 patients in the validation cohort were included to validate  
690 the candidate molecular subtypes. The mutation frequencies of EP300, CREBBP, DST,  
691 MYD88, BTG1, and IRF4 in the validation cohort were greater than 5%. Kaplan–Meier  
692 survival analysis was used to validate the seven candidate molecular subtype combinations.  
693 As shown in **Figure S7E**, the performance of [EP300 (predominant) vs.  
694 MYD88/BTG1/IRF4 $\geq$ 2 vs. others] (3-way P = 0.0202) and [EP300 vs. MYD88/BTG1/IRF4 $\geq$ 2  
695 vs. others (predominant)] (3-way P = 0.0346) was better than those of the other five  
696 molecular subtypes (3-way P > 0.05 for both). Additionally, compared with the [EP300 vs.  
697 MYD88/BTG1/IRF4 $\geq$ 2 vs. others (predominant)] molecular subtype, the Kaplan–Meier  
698 survival curve of [EP300 (predominant) vs. MYD88/BTG1/IRF4 $\geq$ 2 vs. others] showed no  
699 crossover. Finally, the performance of [EP300 (predominant) vs. MYD88/BTG1/IRF4 $\geq$ 2 vs.  
700 others] was the best, so we selected it as the molecular subtype of Chinese PCNSL patients.  
701 In other words, PCNSL patients with both EP300 and BMI (BTG1, IRF4, and MYD88) variants  
702 were categorized into the E3 subtype.

#### 703 Hematoxylin & eosin and immunohistochemical staining

704 PCNSL tumor tissue was fixed with 10% paraformaldehyde and embedded in paraffin. The  
705 paraffin-embedded tissues were cut into 4- $\mu$ m-thick sections. These sections were then  
706 subjected to staining with hematoxylin and eosin (H&E) or for immunohistochemistry. For  
707 H&E staining, the sections were stained with hematoxylin and eosin following standard  
708 protocols (ab245880, Abcam). Immunohistochemistry was performed for ki-67 (ab15580,  
709 Abcam), CD2 (ab314761, Abcam), CD5 (ab75877, Abcam), CD10 (ab256494, Abcam), CD19  
710 (ab134114, Abcam), CD20 (ab78237, Abcam), CD79a (ab79414, Abcam), BCL2 (MA5-11757,

711 Thermo Scientific), BCL6 (PA5-14259, Thermo Scientific), MUM1 (ab247079, Abcam), c-Myc  
712 (MA1-980, Thermo Scientific), and p53 (MA5-14516, Thermo Scientific) via an automated  
713 Leica BOND-III staining system. H&E and immunohistochemistry images were obtained with  
714 a KFBIO scanner (KF-PRO-005-EX, Zhejiang, China) and visualized via KFBIO SlideViewer  
715 software. Each staining was independently reviewed by at least 2 pathologists.

#### 716 **In situ hybridization of fluorescence**

717 PCNSL tumor tissue was fixed with 10% paraformaldehyde and embedded in paraffin. The  
718 paraffin-embedded tissues were cut into 4- $\mu$ m-thick sections. Fluorescence in situ  
719 hybridization was performed in accordance with standard protocols via the following  
720 commercial probes: MYC break-apart, BCL-2 break-apart, and BCL-6 break-apart probes  
721 (LBP Medicine Science & Technology Co., Ltd., Guangzhou, China). Staining was  
722 independently evaluated by two hematopathologists, and discrepancies were resolved by  
723 another hematopathologist.

#### 724 **HIV, HBV, and EBV detection**

725 Antibody and antigen levels of HIV were measured via an Elecsys HIV combi PT assay kit  
726 (Roche, Germany) with a Cobas e 601 analyzer (Roche). EBV-specific PCR was performed  
727 via an EBV virus nucleic acid test kit (Sansure Biotech, China) with an Applied Biosystems  
728 7500 Real-Time PCR System (Thermo Scientific). HBV-specific PCR was performed via an  
729 HBV virus nucleic acid test kit (Sansure Biotech, China) with an Applied Biosystems 7500  
730 Real-Time PCR System (Thermo Scientific).

731

#### 732 **Statistical analysis**

733 All the statistical analyses were performed via R version 4.1.2 and GraphPad Prism version  
734 9. The specific statistical analyses employed for each figure are detailed in the respective  
735 legends.

736 We used PASS software to calculate the sample size for our study, with a significance level  
737 of 0.05 and a power of 0.80. The observed group proportions were 0.6, 0.2, and 0.2, whereas  
738 the expected proportions were 0.33 for each group. The sample size required to meet these  
739 criteria was 25 participants. Consequently, the sample size utilized in this study is deemed  
740 adequate.

741 Whole-exome sequencing data were processed via nf-core/sarek v3.4.2<sup>82</sup> of the nf-core  
742 collection of workflows<sup>83</sup>, which uses reproducible software environments from the  
743 Bioconda<sup>84</sup> and Biocontainers<sup>85</sup> projects. The pipeline was executed with Nextflow v24.04.2<sup>86</sup>.  
744 The software tools and their versions are displayed in **Table S8**.

## 746 **Data and code availability**

747 The raw sequence data have been deposited in the Genome Sequence Archive<sup>87</sup> in the  
748 National Genomics Data Center<sup>88</sup>, China National Center for Bioinformation/Beijing Institute  
749 of Genomics, Chinese Academy of Sciences (GSA-Human HRA006122), which is publicly  
750 accessible at <https://ngdc.cncb.ac.cn/gsa-human>. Any additional information required to  
751 reanalyze the data reported in this paper is available from the lead contact upon request.

752 The raw sequencing data of the DLBCL WES data are accessible from the TCGA database  
753 and were reanalyzed via pipelines and filter settings that were identical to those used in the  
754 present study. The raw WES data of the Japanese PCNSL patients were obtained from the  
755 Japanese Genotype–Phenotype Archive (JGA, <http://trace.ddbj.nig.ac.jp/jga>) and reanalyzed  
756 via pipelines and filtering settings that were identical to those used in the present study, which  
757 is hosted by DDBJ under the accession number JGAS00000000021<sup>3</sup>. The raw sequencing  
758 WES/WGS data of an external independent Chinese PCNSL cohort (n = 36)<sup>17</sup> were obtained  
759 from the China National Center for Bioinformation/Beijing Institute of Genomics, Chinese  
760 Academy of Sciences and reanalyzed via pipelines and filtering settings that were identical  
761 to those used in the present study, under the accession number GSA-Human HRA002475.

762 The frequencies of recurrent genetic alterations in DLBCLs<sup>27</sup> and French PCNSLs<sup>14</sup> are  
763 accessible from the manuscript or supplemental information and were not reanalyzed via  
764 identical pipelines and filtering settings as those used in the present study.

765  
766 **Acknowledgment:** This study was funded by the National Natural Science Foundation of  
767 China (82302582), the Shanghai Municipal Health Commission Project (20224Y0317), the  
768 Shanghai Science and Technology Commission (17430750200), the Join Breakthrough  
769 Project for New Frontier Technologies of Shanghai Hospital Development Center



770 (SHDC12016120), and the Youth Medical Talents–Clinical Laboratory Practitioner Program  
771 (2022-65).

772

773 **Competing Interests:** The authors declare no potential conflicts of interest.

774

775 **Author contributions:** SJ. L, CX. L, DH. L, WJ. C, ZG. X, XT. Z, and Y. M conceived and  
776 designed the project. SJ. L, DH. L, WJ. C, JZ. C, J. R, and ZG. X collected the clinical samples.  
777 SJ. L, JN. W, JZ. C, LY. Z, HW. Y, and Y. S analyzed the WES data and performed  
778 bioinformatic analyses. SJ. L, DH. L, J. R, LY. Z, HW. Y, and JN. W integrated the sequencing  
779 data, drew the display items. SJ. L, DH. L, and CX. L wrote the manuscript. XT. Z and Y. M  
780 oversaw the ethical guidelines and data regulation. WJ. C and Y. M supervised the project.  
781 All of the authors contributed to the final version of the paper.

782

## 783 **References**

- 784 1. Chen, T. *et al.* Evidence-based expert consensus on the management of primary central nervous system  
785 lymphoma in China. *J Hematol Oncol* **15**, 136 (2022).
- 786 2. Ferreri, A. J. M. *et al.* Primary central nervous system lymphoma. *Nat. Rev. Dis. Primers* **9**, 29 (2023).
- 787 3. Fukumura, K. *et al.* Genomic characterization of primary central nervous system lymphoma. *Acta*  
788 *Neuropathol. (Berl.)* **131**, 865–875 (2016).
- 789 4. Braggio, E. *et al.* Genome-Wide Analysis Uncovers Novel Recurrent Alterations in Primary Central Nervous  
790 System Lymphomas. *Clin. Cancer Res.* **21**, 3986–3994 (2015).
- 791 5. Radke, J. *et al.* The genomic and transcriptional landscape of primary central nervous system lymphoma.  
792 *Nat. Commun.* **13**, 2558 (2022).
- 793 6. Vater, I. *et al.* The mutational pattern of primary lymphoma of the central nervous system determined by  
794 whole-exome sequencing. *Leukemia* **29**, 677–685 (2015).
- 795 7. Rosenwald, A. *et al.* The use of molecular profiling to predict survival after chemotherapy for diffuse large-



- 796 B-cell lymphoma. *N. Engl. J. Med.* **346**, 1937–1947 (2002).
- 797 8. Wilson, W. H. *et al.* Targeting B cell receptor signaling with ibrutinib in diffuse large B cell lymphoma. *Nat.*  
798 *Med.* **21**, 922–926 (2015).
- 799 9. Schmitz, R. *et al.* Genetics and Pathogenesis of Diffuse Large B-Cell Lymphoma. *N. Engl. J. Med.* **378**,  
800 1396–1407 (2018).
- 801 10. Chapuy, B. *et al.* Molecular subtypes of diffuse large B cell lymphoma are associated with distinct  
802 pathogenic mechanisms and outcomes. *Nat. Med.* **24**, 679–690 (2018).
- 803 11. Wright, G. W. *et al.* A Probabilistic Classification Tool for Genetic Subtypes of Diffuse Large B Cell  
804 Lymphoma with Therapeutic Implications. *Cancer Cell* **37**, 551–568.e14 (2020).
- 805 12. Shen, R. *et al.* Simplified algorithm for genetic subtyping in diffuse large B-cell lymphoma. *Signal*  
806 *Transduct. Target. Ther.* **8**, 145 (2023).
- 807 13. Swerdlow, S. H. *et al.* The 2016 revision of the World Health Organization classification of lymphoid  
808 neoplasms. *Blood* **127**, 2375–2390 (2016).
- 809 14. Hernández-Verdin, I. *et al.* Molecular and clinical diversity in primary central nervous system lymphoma.  
810 *Ann. Oncol.* **34**, 186–199 (2023).
- 811 15. Yuan, X. *et al.* Analysis of the genomic landscape of primary central nervous system lymphoma using  
812 whole-genome sequencing in Chinese patients. *Front. Med.* **17**, 889–906 (2023).
- 813 16. He, X. *et al.* Analysis of genomic alterations in primary central nervous system lymphoma. *Medicine*  
814 *(Baltimore)* **102**, e34931 (2023).
- 815 17. Zhu, Q. *et al.* Whole-Genome/Exome Sequencing Uncovers Mutations and Copy Number Variations in  
816 Primary Diffuse Large B-Cell Lymphoma of the Central Nervous System. *Front Genet* **13**, 878618 (2022).
- 817 18. Gandhi, M. K. *et al.* EBV-associated primary CNS lymphoma occurring after immunosuppression is a

- 818 distinct immunobiological entity. *Blood* **137**, 1468–1477 (2021).
- 819 19. Kaulen, L. D. *et al.* Integrated genetic analyses of immunodeficiency-associated Epstein-Barr virus- (EBV)  
820 positive primary CNS lymphomas. *Acta Neuropathol* **146**, 499–514 (2023).
- 821 20. Ren, W. *et al.* Genetic landscape of hepatitis B virus-associated diffuse large B-cell lymphoma. *Blood* **131**,  
822 2670–2681 (2018).
- 823 21. Berhan, A., Bayleyegn, B. & Getaneh, Z. HIV/AIDS Associated Lymphoma: Review. *Blood Lymphat Cancer*  
824 **12**, 31–45 (2022).
- 825 22. Pasqualucci, L. *et al.* Analysis of the coding genome of diffuse large B-cell lymphoma. *Nat Genet* **43**, 830–  
826 837 (2011).
- 827 23. Morin, R. D. *et al.* Frequent mutation of histone-modifying genes in non-Hodgkin lymphoma. *Nature* **476**,  
828 298–303 (2011).
- 829 24. Lohr, J. G. *et al.* Discovery and prioritization of somatic mutations in diffuse large B-cell lymphoma (DLBCL)  
830 by whole-exome sequencing. *Proc Natl Acad Sci U S A* **109**, 3879–3884 (2012).
- 831 25. Morin, R. D. *et al.* Mutational and structural analysis of diffuse large B-cell lymphoma using whole-  
832 genome sequencing. *Blood* **122**, 1256–1265 (2013).
- 833 26. de Miranda, N. F. C. C. *et al.* Exome sequencing reveals novel mutation targets in diffuse large B-cell  
834 lymphomas derived from Chinese patients. *Blood* **124**, 2544–2553 (2014).
- 835 27. Reddy, A. *et al.* Genetic and Functional Drivers of Diffuse Large B Cell Lymphoma. *Cell* **171**, 481-494.e15  
836 (2017).
- 837 28. Bruno, A. *et al.* Mutational analysis of primary central nervous system lymphoma. *Oncotarget* **5**, 5065–  
838 5075 (2014).
- 839 29. Chapuy, B. *et al.* Targetable genetic features of primary testicular and primary central nervous system

- 840 lymphomas. *Blood* **127**, 869–881 (2016).
- 841 30. Sanchez-Vega, F. *et al.* Oncogenic Signaling Pathways in The Cancer Genome Atlas. *Cell* **173**, 321-  
842 337.e10 (2018).
- 843 31. Alexandrov, L. B. *et al.* Signatures of mutational processes in human cancer. *Nature* **500**, 415–421 (2013).
- 844 32. Rizvi, N. A. *et al.* Cancer immunology. Mutational landscape determines sensitivity to PD-1 blockade in  
845 non-small cell lung cancer. *Science* **348**, 124–128 (2015).
- 846 33. Mroz, E. A. & Rocco, J. W. MATH, a novel measure of intratumor genetic heterogeneity, is high in poor-  
847 outcome classes of head and neck squamous cell carcinoma. *Oral Oncol* **49**, 211–215 (2013).
- 848 34. Yamamoto, H. *et al.* Microsatellite instability: A 2024 update. *Cancer Sci* **115**, 1738–1748 (2024).
- 849 35. Alizadeh, A. A. *et al.* Distinct types of diffuse large B-cell lymphoma identified by gene expression profiling.  
850 *Nature* **403**, 503–511 (2000).
- 851 36. Hans, C. P. *et al.* Confirmation of the molecular classification of diffuse large B-cell lymphoma by  
852 immunohistochemistry using a tissue microarray. *Blood* **103**, 275–282 (2004).
- 853 37. Phelan, J. D. *et al.* A multiprotein supercomplex controlling oncogenic signalling in lymphoma. *Nature*  
854 **560**, 387–391 (2018).
- 855 38. Ngo, V. N. *et al.* Oncogenically active MYD88 mutations in human lymphoma. *Nature* **470**, 115–119 (2011).
- 856 39. van Imhoff, G. W. *et al.* Prognostic impact of germinal center-associated proteins and chromosomal  
857 breakpoints in poor-risk diffuse large B-cell lymphoma. *J Clin Oncol* **24**, 4135–4142 (2006).
- 858 40. Iwasaki, H. *et al.* The I $\kappa$ B kinase complex regulates the stability of cytokine-encoding mRNA induced by  
859 TLR-IL-1R by controlling degradation of regnase-1. *Nat Immunol* **12**, 1167–1175 (2011).
- 860 41. Kloo, B. *et al.* Critical role of PI3K signaling for NF- $\kappa$ B-dependent survival in a subset of activated B-  
861 cell-like diffuse large B-cell lymphoma cells. *Proc Natl Acad Sci U S A* **108**, 272–277 (2011).

- 862 42. Spencer, D. H. *et al.* Comparison of clinical targeted next-generation sequence data from formalin-fixed  
863 and fresh-frozen tissue specimens. *J Mol Diagn* **15**, 623–633 (2013).
- 864 43. Yokoyama, A. *et al.* Age-related remodelling of oesophageal epithelia by mutated cancer drivers. *Nature*  
865 **565**, 312–317 (2019).
- 866 44. Huang, Y.-H. *et al.* CREBBP/EP300 mutations promoted tumor progression in diffuse large B-cell  
867 lymphoma through altering tumor-associated macrophage polarization via FBXW7-NOTCH-CCL2/CSF1  
868 axis. *Signal Transduct Target Ther* **6**, 10 (2021).
- 869 45. Meyer, S. N. *et al.* Unique and Shared Epigenetic Programs of the CREBBP and EP300 Acetyltransferases  
870 in Germinal Center B Cells Reveal Targetable Dependencies in Lymphoma. *Immunity* **51**, 535-547.e9  
871 (2019).
- 872 46. Wei, W. *et al.* Analysis and therapeutic targeting of the EP300 and CREBBP acetyltransferases in anaplastic  
873 large cell lymphoma and Hodgkin lymphoma. *Leukemia* **37**, 396–407 (2023).
- 874 47. Nayyar, N. *et al.* MYD88 L265P mutation and CDKN2A loss are early mutational events in primary central  
875 nervous system diffuse large B-cell lymphomas. *Blood Adv* **3**, 375–383 (2019).
- 876 48. Zhou, Y. *et al.* Analysis of Genomic Alteration in Primary Central Nervous System Lymphoma and the  
877 Expression of Some Related Genes. *Neoplasia* **20**, 1059–1069 (2018).
- 878 49. Zheng, M. *et al.* Frequency of MYD88 and CD79B mutations, and MGMT methylation in primary central  
879 nervous system diffuse large B-cell lymphoma. *Neuropathology* **37**, 509–516 (2017).
- 880 50. Yamada, S., Ishida, Y., Matsuno, A. & Yamazaki, K. Primary diffuse large B-cell lymphomas of central  
881 nervous system exhibit remarkably high prevalence of oncogenic MYD88 and CD79B mutations. *Leuk*  
882 *Lymphoma* **56**, 2141–2145 (2015).
- 883 51. Takano, S. *et al.* MyD88 Mutation in Elderly Predicts Poor Prognosis in Primary Central Nervous System

- 884 Lymphoma: Multi-Institutional Analysis. *World Neurosurg* **112**, e69–e73 (2018).
- 885 52. Hattori, K. *et al.* MYD88 (L265P) mutation is associated with an unfavourable outcome of primary central  
886 nervous system lymphoma. *Br J Haematol* **177**, 492–494 (2017).
- 887 53. Curran, O. E. *et al.* MYD88 L265P mutation in primary central nervous system lymphoma is associated  
888 with better survival: A single-center experience. *Neurooncol Adv* **3**, vdab090 (2021).
- 889 54. Agostinelli, C. *et al.* Genomic Profiling of Primary Diffuse Large B-Cell Lymphoma of the Central Nervous  
890 System Suggests Novel Potential Therapeutic Targets. *Mod Pathol* **36**, 100323 (2023).
- 891 55. Wong, R. W. J. *et al.* Feed-forward regulatory loop driven by IRF4 and NF- $\kappa$ B in adult T-cell  
892 leukemia/lymphoma. *Blood* **135**, 934–947 (2020).
- 893 56. Tsuboi, K. *et al.* MUM1/IRF4 expression as a frequent event in mature lymphoid malignancies. *Leukemia*  
894 **14**, 449–456 (2000).
- 895 57. Nakagawa, M. *et al.* Targeting the HTLV-I-Regulated BATF3/IRF4 Transcriptional Network in Adult T Cell  
896 Leukemia/Lymphoma. *Cancer Cell* **34**, 286–297.e10 (2018).
- 897 58. Weilemann, A. *et al.* Essential role of IRF4 and MYC signaling for survival of anaplastic large cell lymphoma.  
898 *Blood* **125**, 124–132 (2015).
- 899 59. Shaffer, A. L. *et al.* IRF4 addiction in multiple myeloma. *Nature* **454**, 226–231 (2008).
- 900 60. Amanda, S. *et al.* IRF4 drives clonal evolution and lineage choice in a zebrafish model of T-cell lymphoma.  
901 *Nat Commun* **13**, 2420 (2022).
- 902 61. Yang, Y. *et al.* Exploiting synthetic lethality for the therapy of ABC diffuse large B cell lymphoma. *Cancer*  
903 *Cell* **21**, 723–737 (2012).
- 904 62. Delage, L. *et al.* BTG1 inactivation drives lymphomagenesis and promotes lymphoma dissemination  
905 through activation of BCAR1. *Blood* **141**, 1209–1220 (2023).

- 906 63. Mlynarczyk, C. *et al.* BTG1 mutation yields supercompetitive B cells primed for malignant transformation.  
907 *Science* **379**, eabj7412 (2023).
- 908 64. Tijchon, E. *et al.* Tumor suppressors BTG1 and BTG2 regulate early mouse B-cell development.  
909 *Haematologica* **101**, e272-276 (2016).
- 910 65. Scheijen, B. *et al.* Tumor suppressors BTG1 and IKZF1 cooperate during mouse leukemia development  
911 and increase relapse risk in B-cell precursor acute lymphoblastic leukemia patients. *Haematologica* **102**,  
912 541–551 (2017).
- 913 66. Li, Y. *et al.* The predictive value of BTG1 for the response of newly diagnosed acute myeloid leukemia to  
914 decitabine. *Clin Epigenetics* **16**, 16 (2024).
- 915 67. Abrey, L. E. *et al.* Report of an international workshop to standardize baseline evaluation and response  
916 criteria for primary CNS lymphoma. *J Clin Oncol* **23**, 5034–5043 (2005).
- 917 68. Hoang-Xuan, K. *et al.* Diagnosis and treatment of primary CNS lymphoma in immunocompetent patients:  
918 guidelines from the European Association for Neuro-Oncology. *Lancet Oncol* **16**, e322–332 (2015).
- 919 69. Li, Q. *et al.* Improvement of outcomes of an escalated high-dose methotrexate-based regimen for  
920 patients with newly diagnosed primary central nervous system lymphoma: a real-world cohort study.  
921 *Cancer Manag Res* **13**, 6115–6122 (2021).
- 922 70. Freed, D., Aldana, R., Weber, J. A. & Edwards, J. S. The Sentieon Genomics Tools—A fast and accurate  
923 solution to variant calling from next-generation sequence data. *BioRxiv* 115717 (2017).
- 924 71. McLaren, W. *et al.* The Ensembl Variant Effect Predictor. *Genome Biol* **17**, 122 (2016).
- 925 72. Mayakonda, A., Lin, D.-C., Assenov, Y., Plass, C. & Koeffler, H. P. Maftools: efficient and comprehensive  
926 analysis of somatic variants in cancer. *Genome Res* **28**, 1747–1756 (2018).
- 927 73. Wang, Y. *et al.* Comprehensive identification of somatic nucleotide variants in human brain tissue.

- 928 *Genome Biol* **22**, 92 (2021).
- 929 74. Sathirapongsasuti, J. F. *et al.* Exome sequencing-based copy-number variation and loss of heterozygosity  
930 detection: ExomeCNV. *Bioinformatics* **27**, 2648–2654 (2011).
- 931 75. Favero, F. *et al.* Sequenza: allele-specific copy number and mutation profiles from tumor sequencing data.  
932 *Ann Oncol* **26**, 64–70 (2015).
- 933 76. Mermel, C. H. *et al.* GISTIC2.0 facilitates sensitive and confident localization of the targets of focal somatic  
934 copy-number alteration in human cancers. *Genome Biol* **12**, R41 (2011).
- 935 77. Chakravarty, D. *et al.* OncoKB: A Precision Oncology Knowledge Base. *JCO Precis Oncol* **2017**,  
936 PO.17.00011 (2017).
- 937 78. Vogelstein, B. *et al.* Cancer genome landscapes. *Science* **339**, 1546–1558 (2013).
- 938 79. Griffith, M. *et al.* CIViC is a community knowledgebase for expert crowdsourcing the clinical interpretation  
939 of variants in cancer. *Nat Genet* **49**, 170–174 (2017).
- 940 80. Alexandrov, L. B. *et al.* The repertoire of mutational signatures in human cancer. *Nature* **578**, 94–101  
941 (2020).
- 942 81. Chalmers, Z. R. *et al.* Analysis of 100,000 human cancer genomes reveals the landscape of tumor  
943 mutational burden. *Genome Med* **9**, 34 (2017).
- 944 82. Garcia, M. *et al.* Sarek: A portable workflow for whole-genome sequencing analysis of germline and  
945 somatic variants. *F1000Res* **9**, 63 (2020).
- 946 83. Ewels, P. A. *et al.* The nf-core framework for community-curated bioinformatics pipelines. *Nat Biotechnol*  
947 **38**, 276–278 (2020).
- 948 84. Grüning, B. *et al.* Bioconda: sustainable and comprehensive software distribution for the life sciences. *Nat*  
949 *Methods* **15**, 475–476 (2018).



- 950 85. da Veiga Leprevost, F. *et al.* BioContainers: an open-source and community-driven framework for  
951 software standardization. *Bioinformatics* **33**, 2580–2582 (2017).
- 952 86. P, D. T. *et al.* Nextflow enables reproducible computational workflows. *Nature biotechnology* **35**, (2017).
- 953 87. Chen, T. *et al.* The Genome Sequence Archive Family: Toward Explosive Data Growth and Diverse Data  
954 Types. *Genomics Proteomics Bioinformatics* **19**, 578–583 (2021).
- 955 88. CNCB-NGDC Members and Partners. Database Resources of the National Genomics Data Center, China  
956 National Center for Bioinformation in 2022. *Nucleic Acids Res* **50**, D27–D38 (2022).
- 957

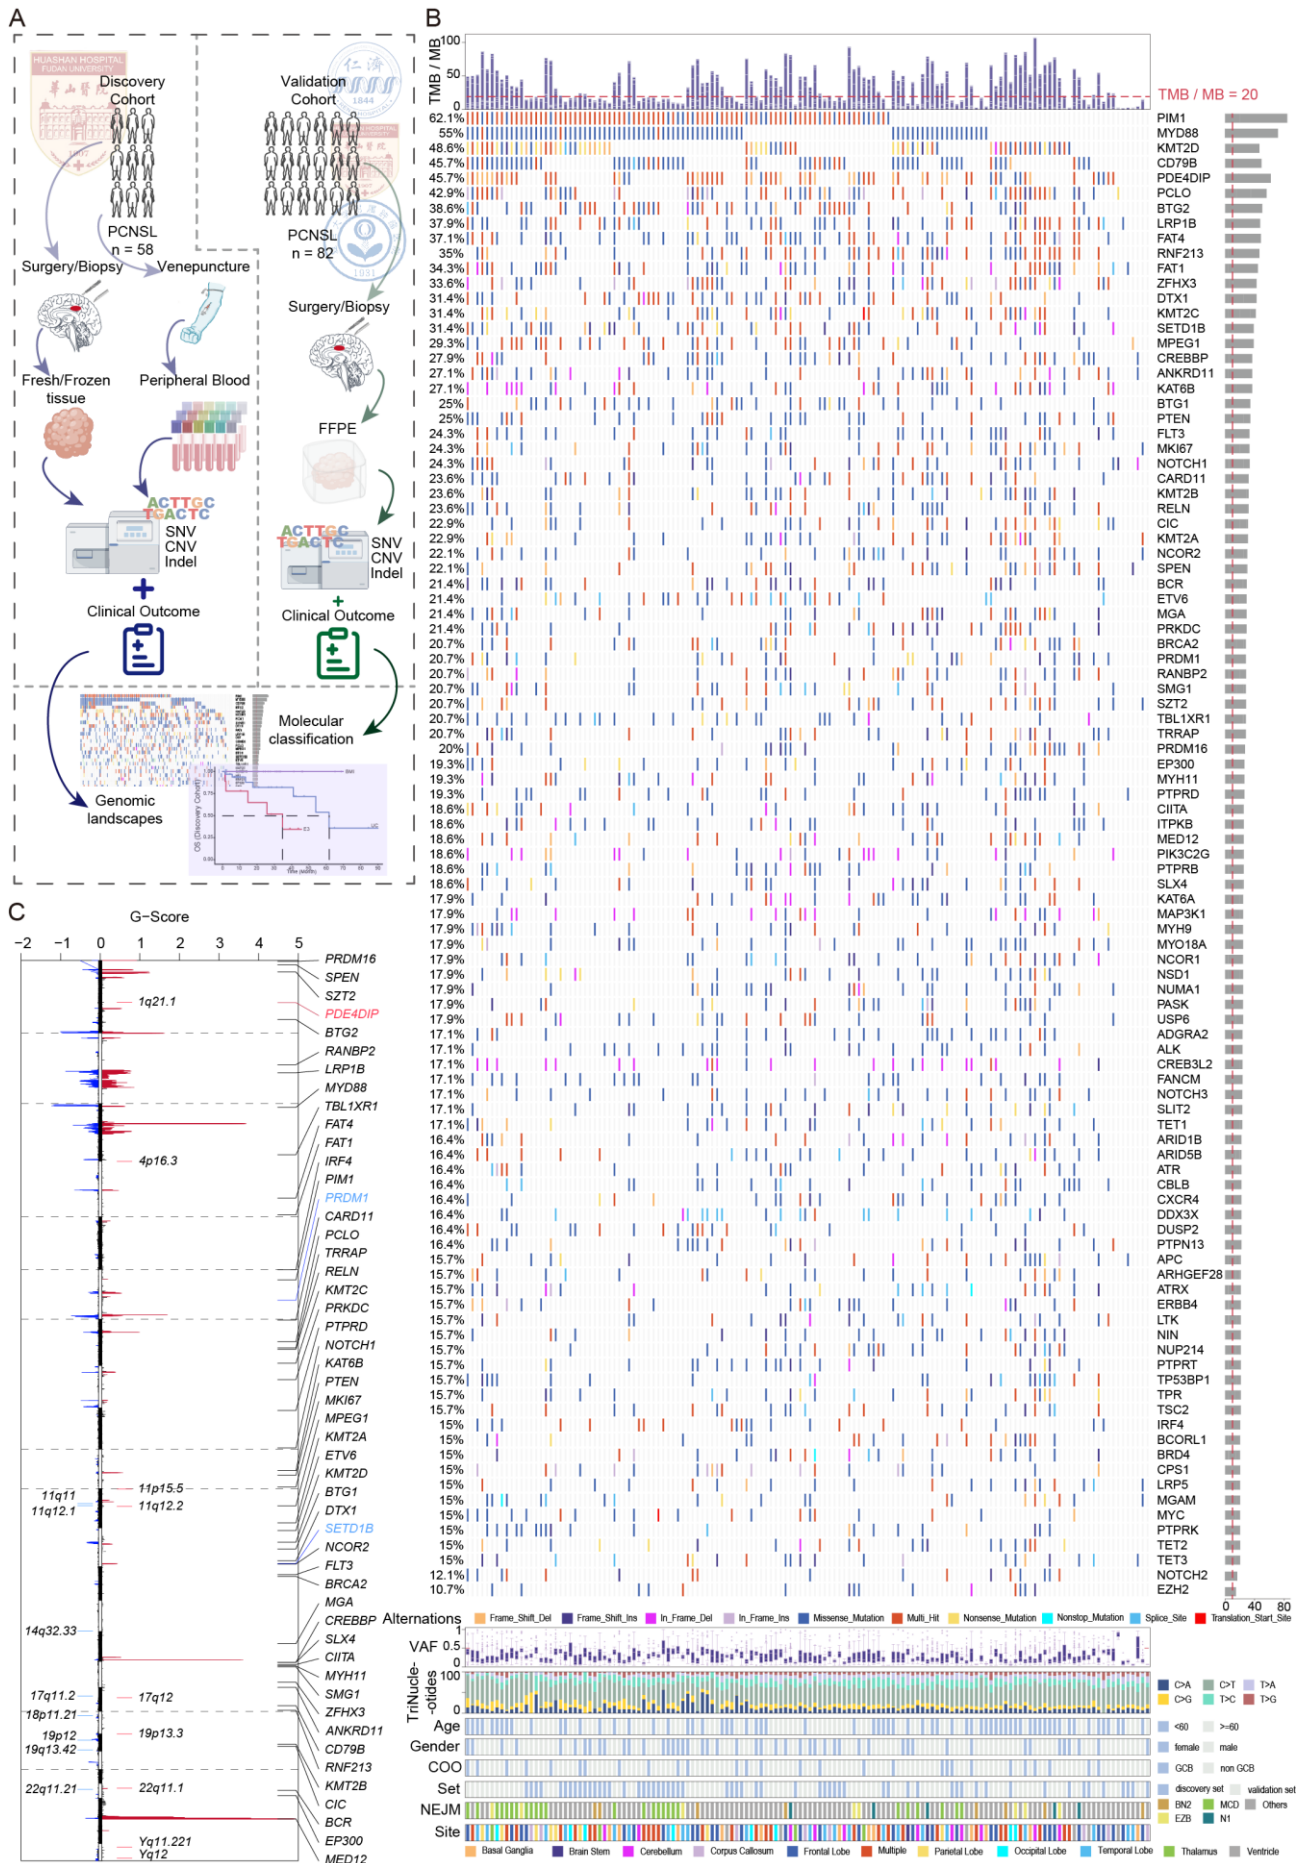

959 **Figure 1. Study design and the PCNSL mutational landscape in Chinese patients**

960 A: Study design, including workflow and data composition for the discovery cohort and  
961 validation cohort.

962 B: Number and frequency of recurrent mutations. Gene–sample matrix of recurrently mutated  
963 genes ranked by mutation frequency (n = 140). The total mutation density across the cohort  
964 is displayed at the top, with the variant allele fraction and trinucleotides at the bottom.

965 C: GISTIC2.0 results of significant recurrent focal amplifications (red) and deletions (blue).  
966 Genes affected by each focal event are annotated (n = 140). X-axis: plot of chromosomes;  
967 Y-axis: G score.

968

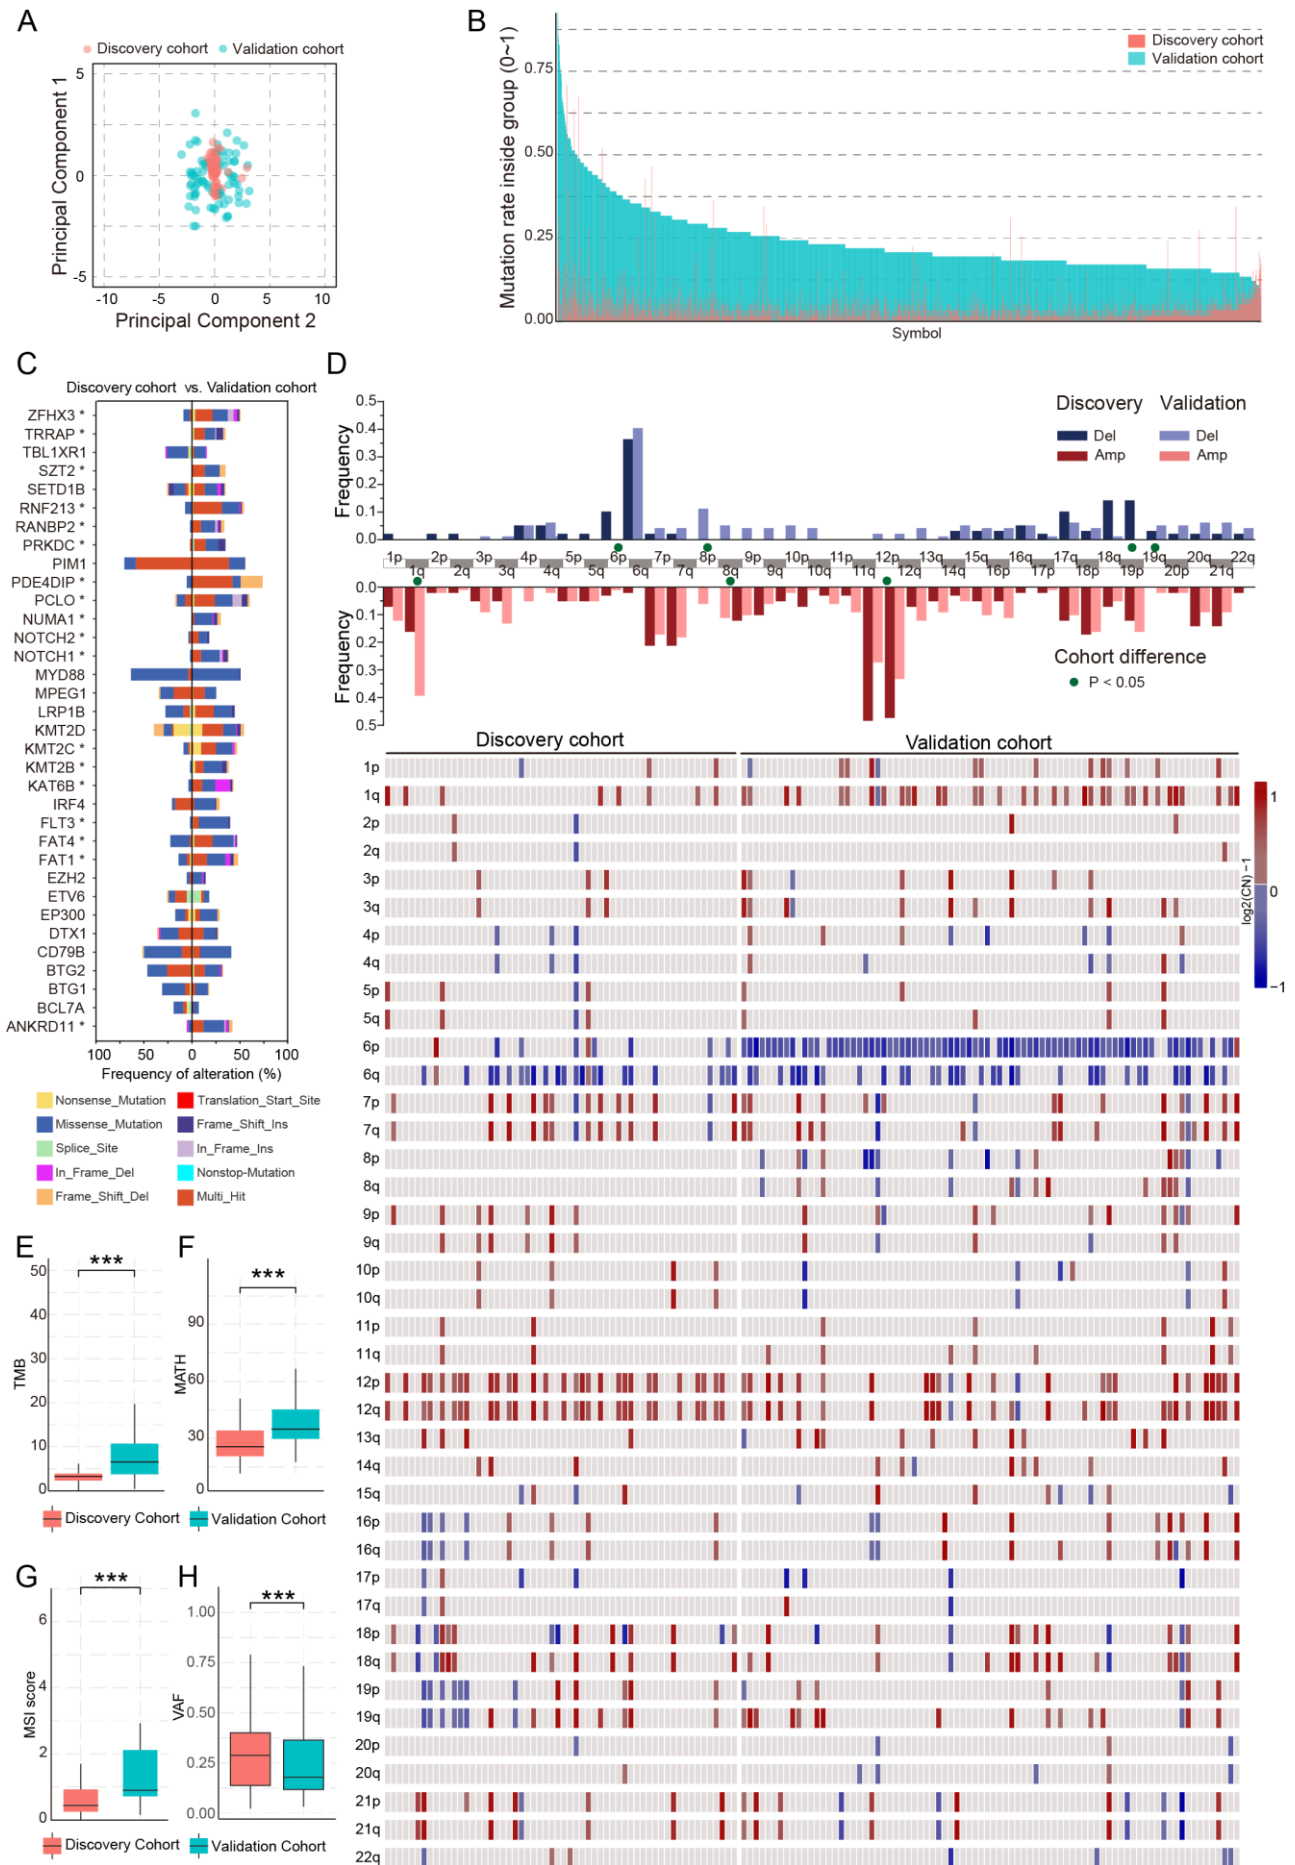

970 **Figure 2. Comparison of mutation profiles between the discovery cohort and validation**  
971 **cohort of PCNSL patients**

972 A: Principal component analysis of whole-exome sequencing (WES) data between the  
973 discovery cohort and validation cohort of PCNSL patients

974 B: Mutation rate of WES data between the discovery cohort and validation cohort of PCNSL  
975 patients

976 C: A mirror bar plot showing the frequencies of genetic alterations in the discovery cohort of  
977 PCNSL patients compared with those in the validation cohort.

978 D: Arm-level copy number alterations of the discovery cohort and validation cohort samples  
979 are displayed. The frequencies of amplifications and deletions were compared.

980 E: Comparison of the tumor mutational burden (TMB) between the discovery cohort and the  
981 validation cohort of PCNSL patients

982 F: The levels of mutant-allele tumor heterogeneity (MATH) in the discovery cohort and the  
983 validation cohort of PCNSL patients were compared.

984 G: The levels of microsatellite instability (MSI) in the discovery cohort and the validation  
985 cohort of PCNSL patients were compared.

986 H: The variant allele frequency (VAF) in the discovery cohort and the validation cohort of  
987 PCNSL patients were compared.

988 The discovery cohort included blood-paired fresh tumor tissue samples (n = 58), and the  
989 validation cohort included unpaired FFPE tumor tissue samples (n = 82). Independent-  
990 samples t tests and chi-squared tests were used. \* $P < 0.05$ ; \*\* $P < 0.01$ ; \*\*\* $P < 0.001$ .

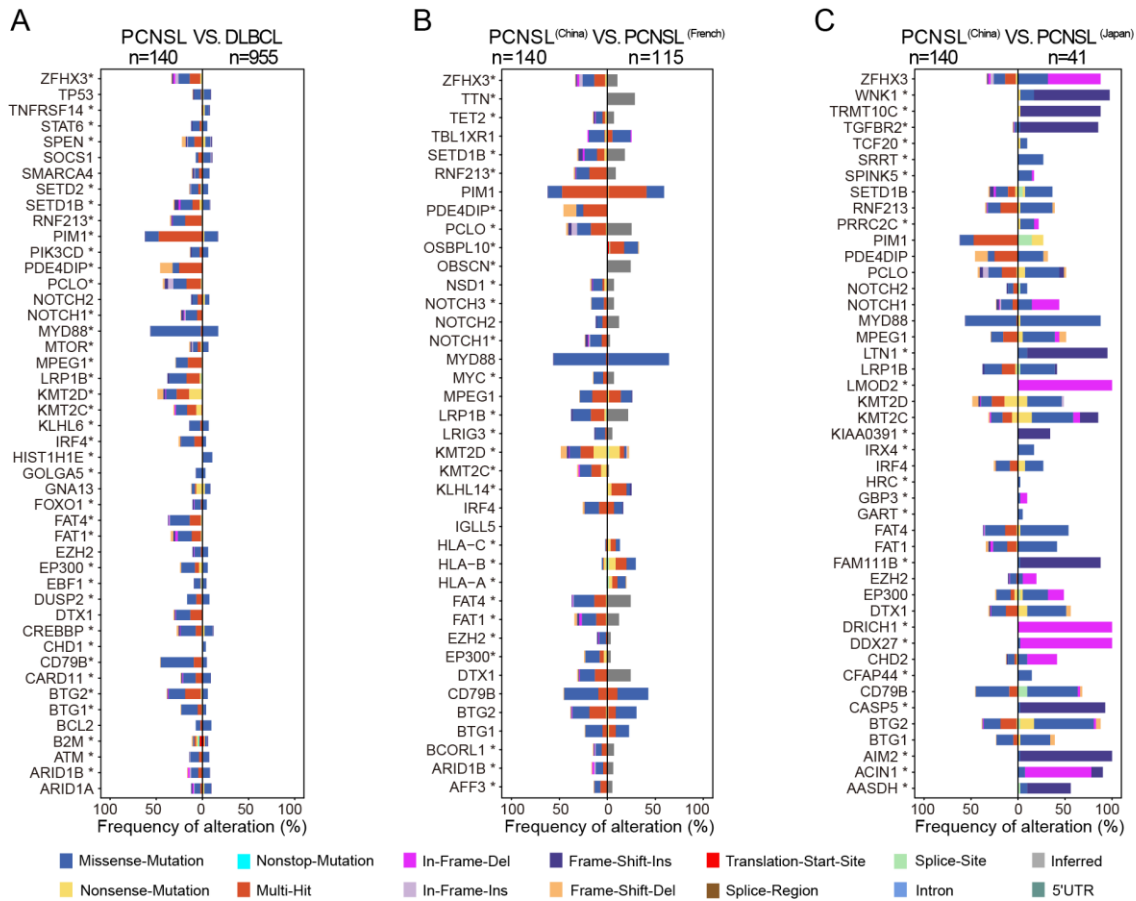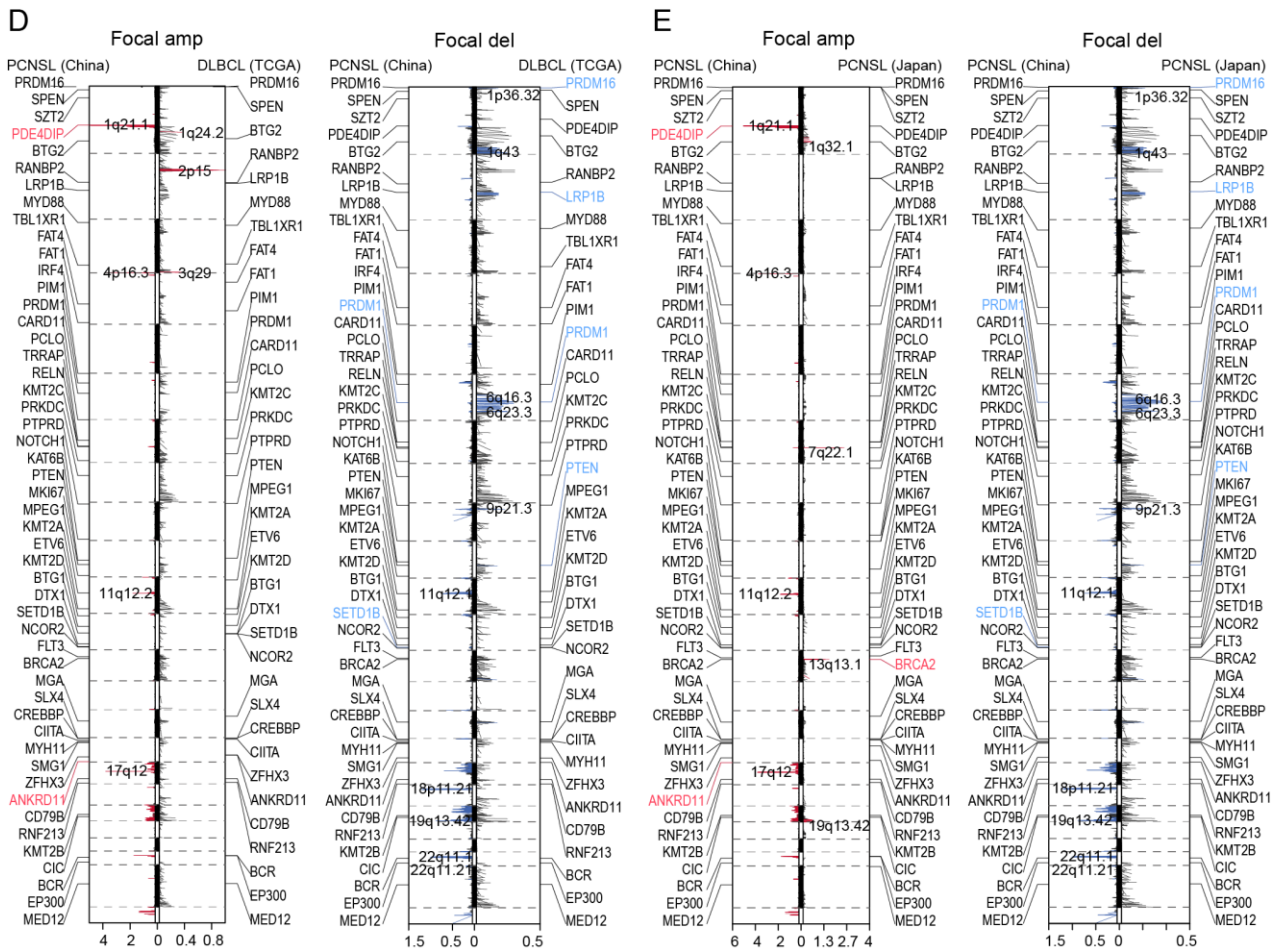



992 **Figure 3. Mutation profiles of Chinese PCNSLs, DLBCLs, and PCNSLs of other races**  
993 A: A mirror bar plot showing the frequencies of genetic alterations between Chinese PCNSL  
994 patients (n = 140) and DLBCL patients (n = 955).  
995 B: A mirror bar plot showing the frequencies of genetic alterations between Chinese PCNSL  
996 patients (n = 140) and French PCNSL patients (n = 115).  
997 C: A mirror bar plot showing the frequencies of genetic alterations between Chinese PCNSL  
998 patients (n = 140) and Japanese PCNSL patients (n = 41).  
999 D: GISTIC-defined recurrent copy number focal deletions (blue) and gains (red) as mirror  
1000 plots in DLBCL (TCGA, n = 46) and Chinese PCNSLs (n = 140) are shown. X-axis: plot of  
1001 chromosomes; Y-axis: G score.  
1002 E: The GISTIC2.0-defined recurrent copy number focal deletions (blue) and gains (red) in  
1003 Japanese PCNSL patients (n = 41) and Chinese PCNSL patients (n = 140) are shown as  
1004 mirror plots. Y-axis: plot of chromosomes; X-axis: G score.  
1005 The chi-squared test was used. \* $P < 0.05$ . In the figure legend of A-C, 'Inferred' means that  
1006 the mutation types were not directly provided but were calculated from the supplemental  
1007 tables of the corresponding paper; thus, the results are 'Inferred', and the *in fact*o mutation  
1008 number will not be less than the inferred value.



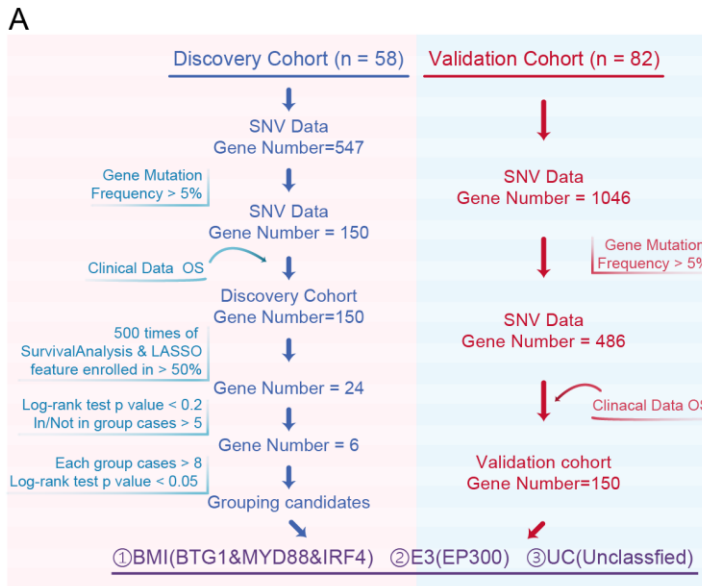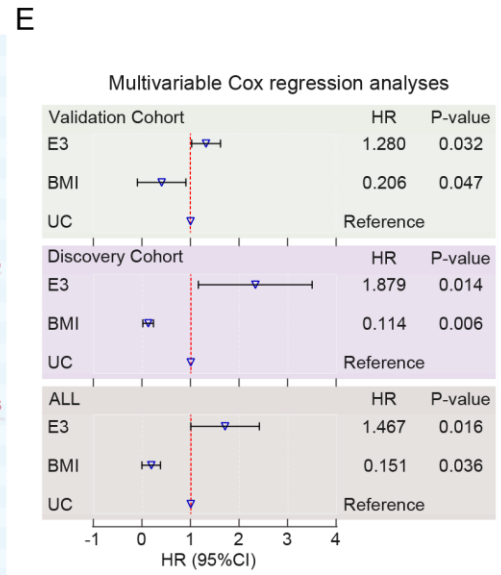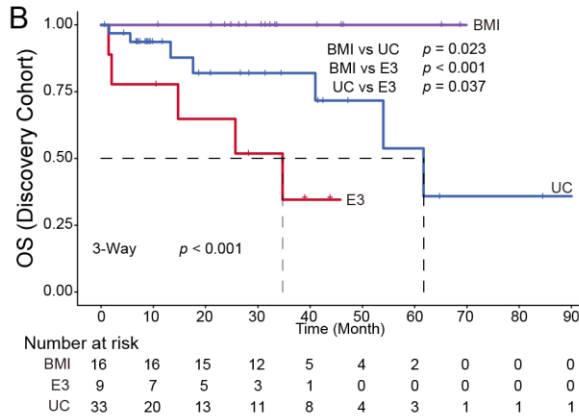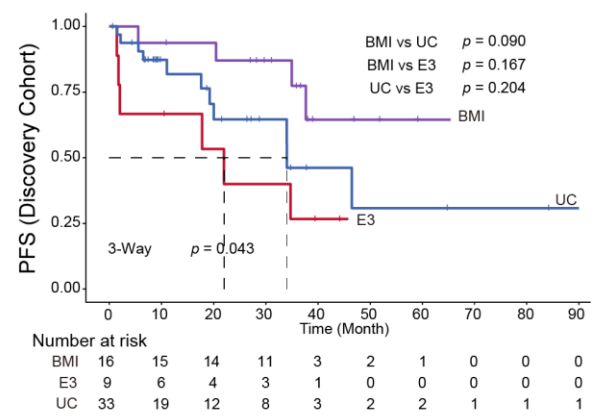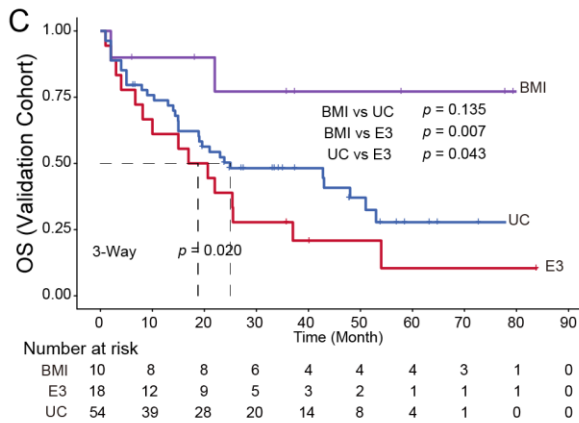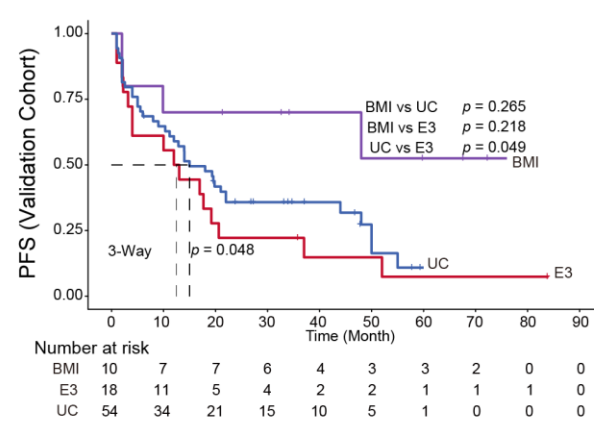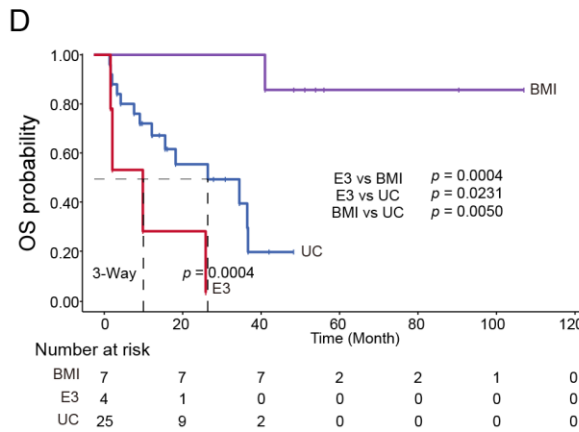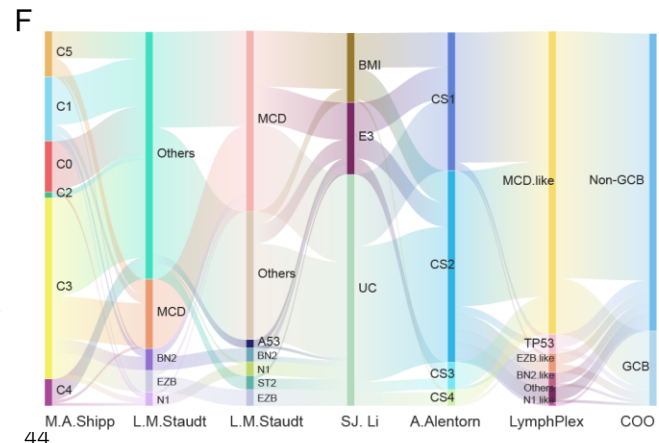

1010 **Figure 4. Integrated genetic drivers reveal PCNSL molecular subtypes with clinical**  
1011 **outcome implications**

1012 A: Schematic of the typing strategies used to identify PCNSL molecular subtypes in the  
1013 discovery cohort (n = 58) and in the validation cohort (n = 82).

1014 B: Kaplan–Meier estimates of overall survival (OS) and progression-free survival (PFS)  
1015 among patients belonging to each molecular subtype in the discovery cohort.

1016 C: Kaplan–Meier estimates of overall survival (OS) and progression-free survival (PFS)  
1017 among patients belonging to each molecular subtype in the validation cohort.

1018 D: Kaplan–Meier estimates of overall survival (OS) among patients belonging to each  
1019 molecular subtype in an independent external cohort (n=36).

1020 E: Hazard ratio estimates of overall survival in PCNSL patients (n = 140).

1021 F: Sankey diagram illustrating the relationships between our PCNSL molecular subtypes and  
1022 the published DLBCL and PCNSL molecular subtypes.

1023

1024

1025

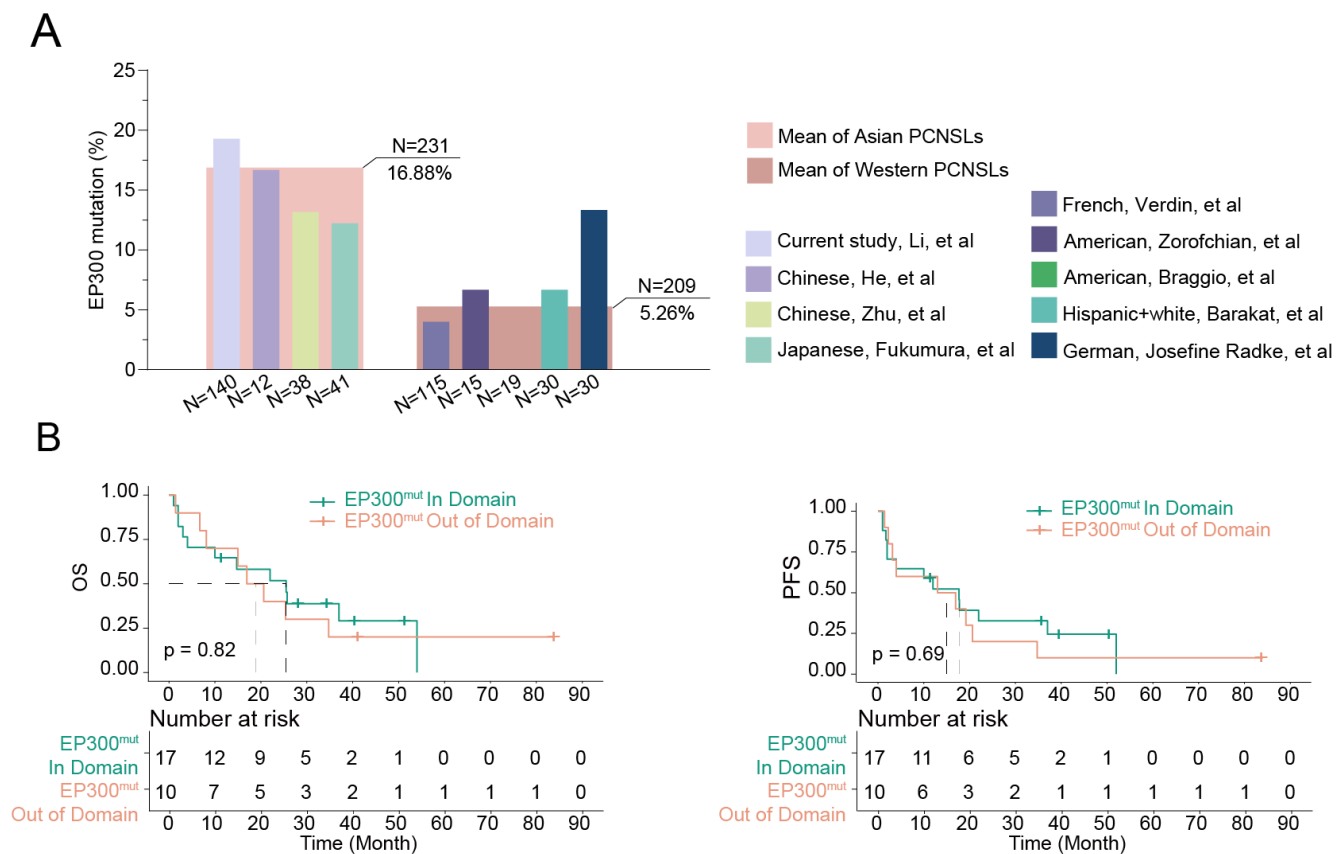

**Figure 5. Mutation frequency among races and prognosis of EP300**

A: The prevalence of EP300 mutations in PCNSL patients of different races.

B: Kaplan–Meier analyses for comparisons of the overall survival (OS) and progression-free survival (PFS) of patients with mutations within and those with mutations outside the EP300 domain.

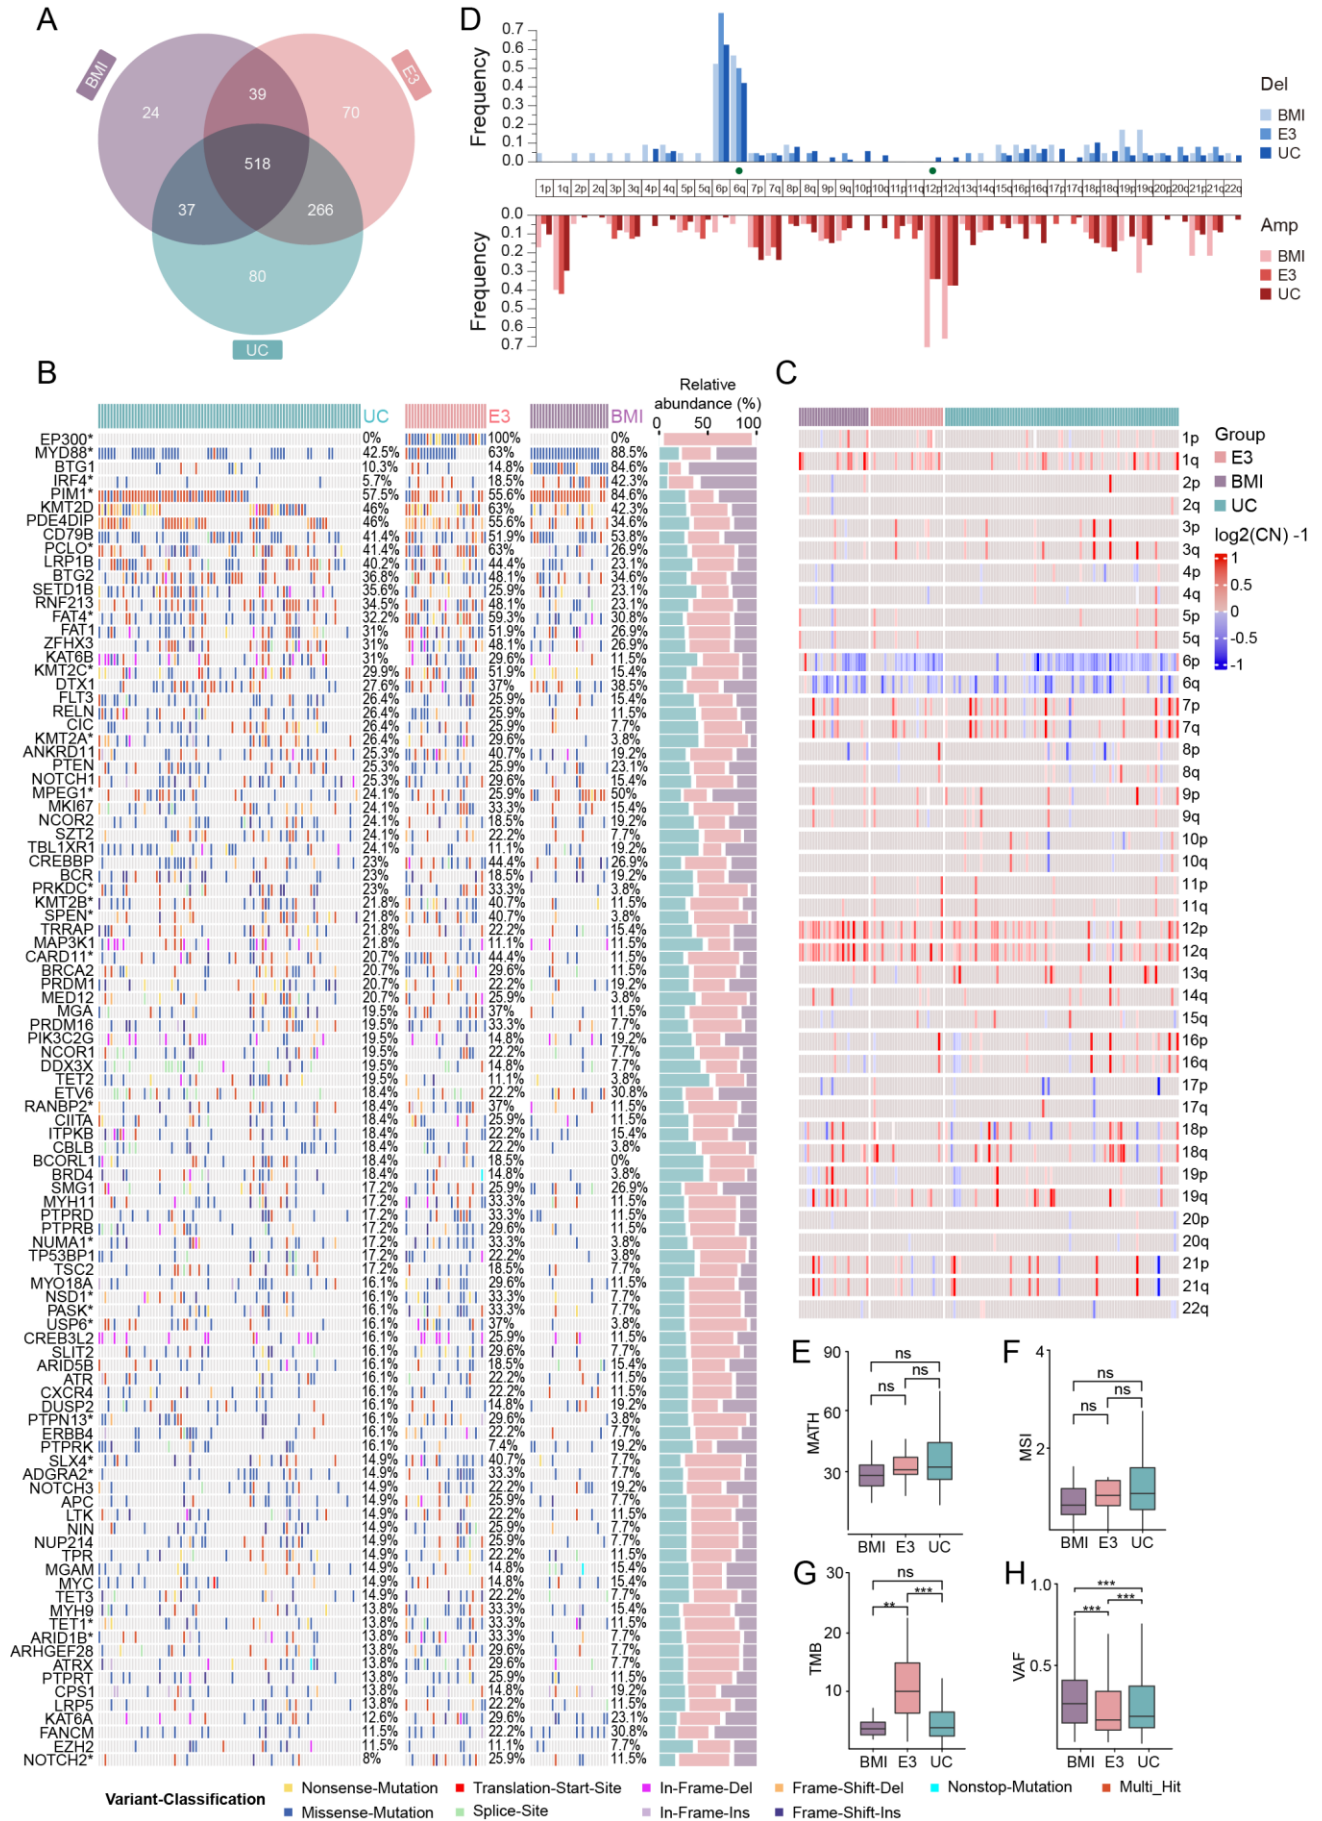

1034 **Figure 6. Mutation profiles across three molecular subtypes of PCNSL**  
1035 A: Venn diagram showing unique and shared mutations among the three identified PCNSL  
1036 subtypes.  
1037 B: Number and frequency of recurrent mutations and the gene–sample matrix of recurrently  
1038 mutated genes among the three PCNSL subtypes. The relative abundance across the  
1039 molecular subtypes is displayed on the right.  
1040 C: Arm-level copy number alterations among the three molecular subtype samples are  
1041 displayed.  
1042 D: The frequencies of amplifications and deletions were compared among the three  
1043 molecular subtype samples.  
1044 E: The levels of mutant-allele tumor heterogeneity (MATH) were compared among the three  
1045 molecular subtype samples.  
1046 F: The levels of microsatellite instability (MSI) were compared among the three MS samples.  
1047 G: The tumor mutational burden (TMB) was compared among the three MS samples.  
1048 H: The levels of variant allele frequency (VAF) were compared among the three MS samples.  
1049 Independent-samples t tests and chi-squared tests were used. \* $P < 0.05$ ; \*\* $P < 0.01$ ; \*\*\* $P <$   
1050  $0.001$ ; ns  $P > 0.05$ .  
1051



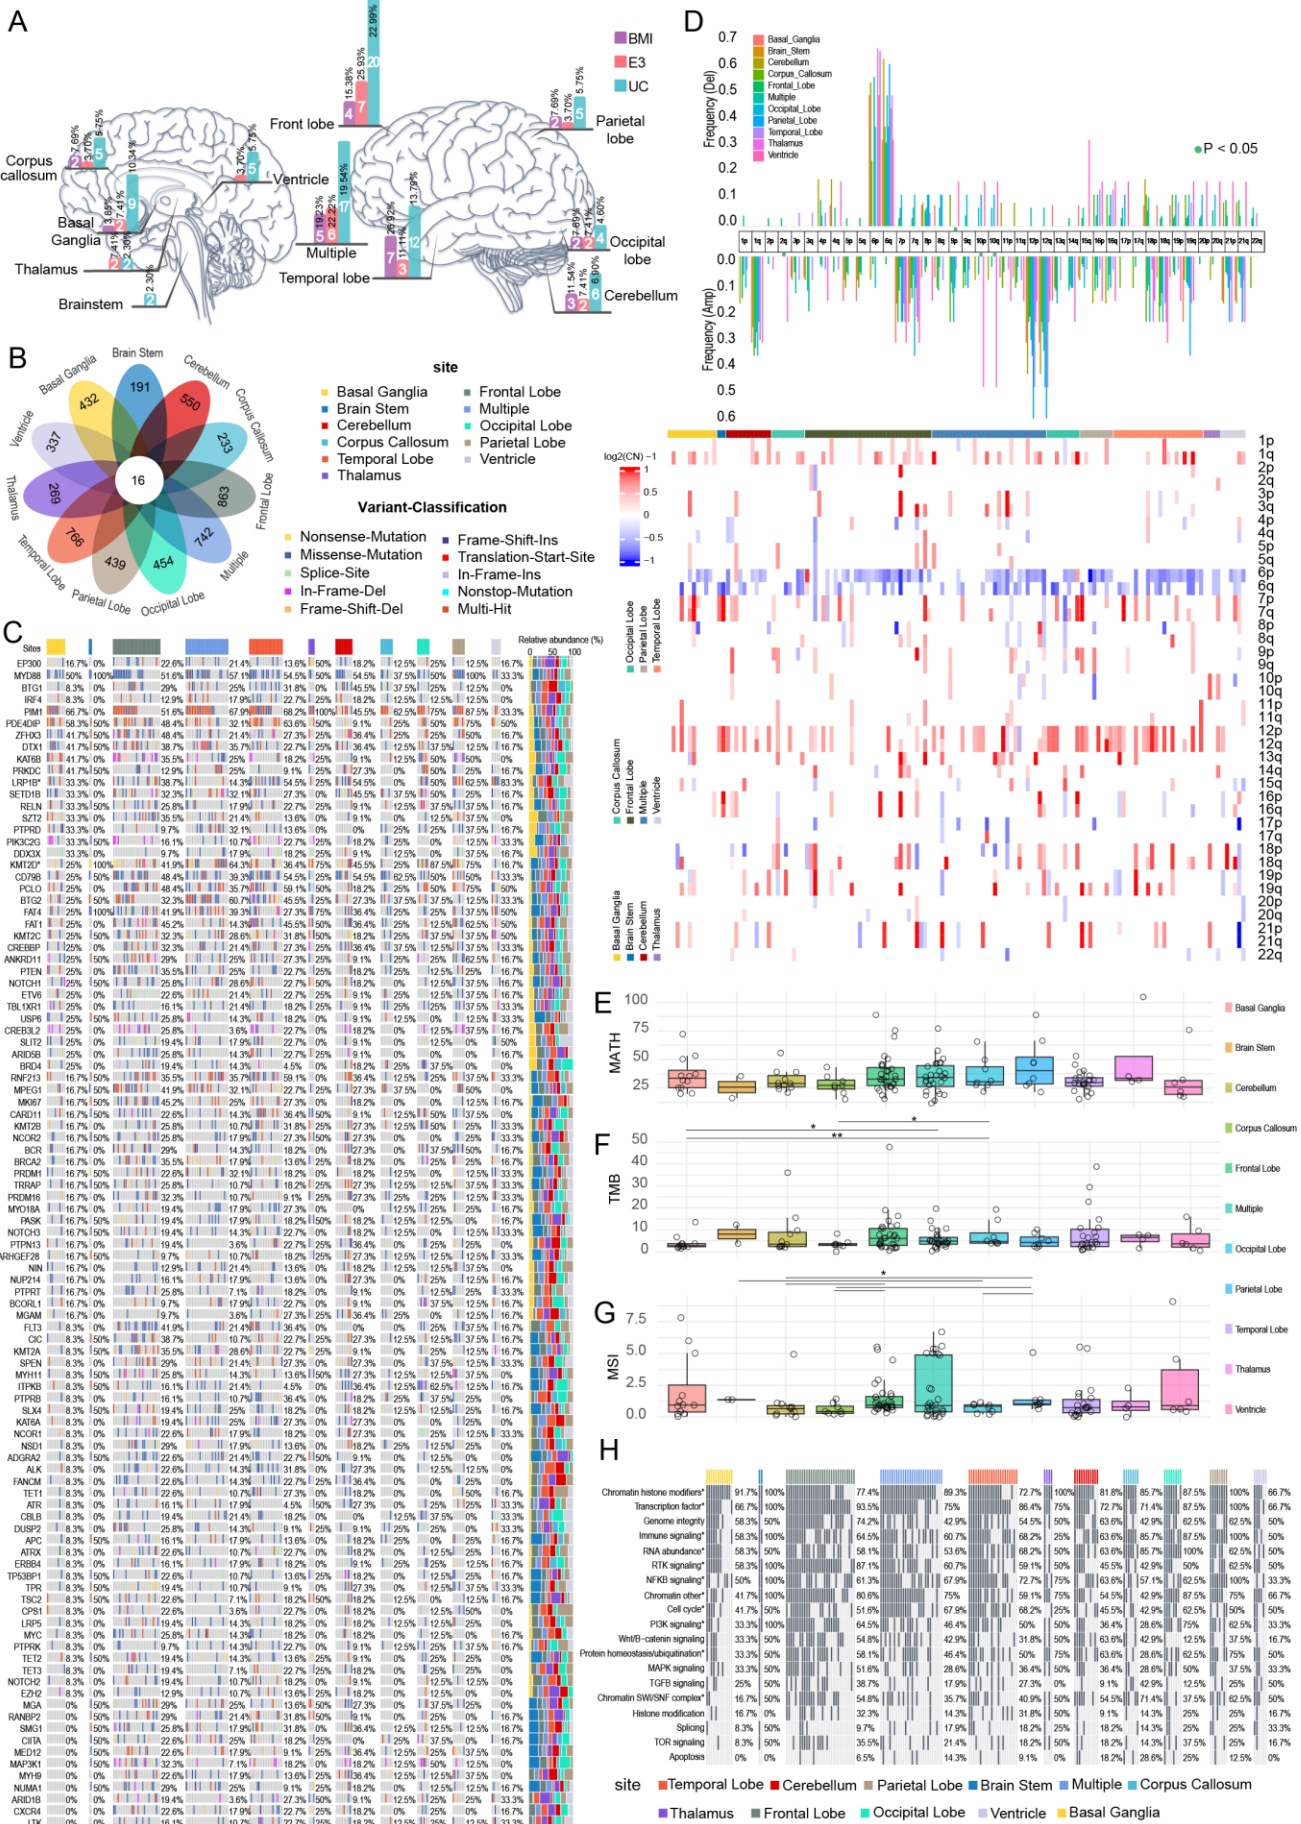

1053 **Figure 7. Mutational profiles across different sites of onset in PCNSL**

1054 A: The number and percentage of PCNSL patients with various molecular subtypes at  
1055 different disease onset sites.

1056 B: Venn diagram of unique and shared mutations among PCNSLs with different sites of onset.

1057 C: The number and frequency of recurrent mutations, along with a gene–sample matrix of  
1058 recurrently mutated genes in PCNSL patients at different sites of onset, are presented. The  
1059 relative abundance across the molecular subtypes is displayed on the right.

1060 D: Arm-level copy number alterations across different sites of onset are displayed. The  
1061 frequencies of amplifications and deletions were compared.

1062 E: The levels of mutant-allele tumor heterogeneity (MATH) were compared among the  
1063 samples representing different sites of onset.

1064 F: Comparisons of the tumor mutational burden (TMB) among the different sites of onset  
1065 samples were performed.

1066 G: The levels of microsatellite instability (MSI) were compared among the samples  
1067 representing different sites of onset.

1068 H: Pathways affected by oncogenes in PCNSL patients with different sites of onset.

1069 The chi-squared test and one-way ANOVA were used. \* $P < 0.05$ .

1070
